# Supplementary material for: Rapid screening for genitourinary cancers: mass spectrometry-based metabolic fingerprinting of urine
Source: Royal Society of Chemistry journal article supplement (doi:10.1039/d2cc02329f), 2022-01-01
Supplement: d2cc02329f1.pdf [file d2cc02329f1.pdf]

## Supplementary Information

### **Rapid screening for genitourinary cancer: mass spectrometry-based metabolic fingerprinting of urine**

Xiao Wang<sup>1,2</sup>, Yuze Li<sup>1,2</sup>, Jinghan Fan<sup>2</sup>, Liuying He<sup>1,2</sup>, Junyu Chen<sup>1,2</sup>, Huihui Liu<sup>1,2\*</sup>, Zongxiu Nie<sup>1,2\*</sup>

<sup>1</sup> Beijing National Laboratory for Molecular Sciences, Key Laboratory of Analytical Chemistry for Living Biosystems, Institute of Chemistry, Chinese Academy of Sciences, Beijing 100190, China

<sup>2</sup> University of Chinese Academy of Sciences, Beijing 100049, China.

\*Corresponding author. Email: [znie@iccas.ac.cn](mailto:znie@iccas.ac.cn) (Z. Nie), [hhliu@iccas.ac.cn](mailto:hhliu@iccas.ac.cn) (H. Liu).

#### **This PDF file includes:**

Materials and Methods

(Chemical and materials, Urine sample collection, Matrix selection for MALDI-MS, Mass spectrometry analysis, Statistical analysis, Equations)

Ethics statement

Data availability

Author contributions

Acknowledgements

Figures S1 to S18

Tables S1 to S7

References

## Materials and Methods

### Chemical and materials

All materials and reagents were commercially available. The internal standard 3-Chloro-L-phenylalanine (L-Phe(3-Cl)-OH) (PubChem CID: 2761492) was purchased from Aladdin (Beijing, China). Matrix: 1-Naphthylhydrazine hydrochloride (NHHC, PubChem CID: 519949, from Alfa Aesar), N-(1-naphthyl) ethylenediamine dihydrochloride (NEDC, from Aladdin), 2,5-dihydroxybenzoic acid (DHB, from Alfa Aesar),  $\alpha$ -cyano-4-hydroxycinnamic acid (CCA, from Aladdin), 9-aminoacridine (9AA, from fluka), sinapinic acid (SA, from Sigma-Aldrich). Methanol (HPLC grade) and acetonitrile (HPLC grade) were purchased from Thermo Fisher. The deionized water used in all experiments was prepared using a Milli-Q Integral water purification system from Millipore (Milford, MA, U.S.A.). All other solvents and chemicals were of analytical grade.

### Urine sample collection

This study was carried out in accordance with relevant ethical regulations and guidelines of the Hospital Scientific Research Ethics Committee of First Affiliated Hospital of Gannan Medical University. All the BC and PC patients were diagnosed by histopathological examination in hospital. The fasting morning urine samples of BC patients and HC volunteers were obtained from the First Affiliated Hospital of Gannan Medical University and stored at -80°C until analysis. The urine samples of PC patients were obtained from Beijing Hospital in the same procedure. In this study, 38 BC, 39 PC, and 40 HC urine samples were enrolled. The detailed information was summarized in Table S3 and Table S6. No more pretreatment except unfreezing the samples and mixed with matrix and internal standard was used during the experiment.

To explore the metabolic differences between cancer patients and healthy control volunteers, we divided all subjects into four cohorts for comparison: GU (BC+PC) vs HC, BC vs PC, BC vs HC, and PC vs HC. To ensure that meaningful comparisons could be made between the two groups within each cohort, we need that there is no statistical significance in the distribution of age and gender.

## Matrix selection for MALDI-MS

To get the optimal signals for better mining diagnostic information from urine samples, we first examined the effectiveness of several common small-molecule matrices for urine analysis, including 2,5-dihydroxybenzoic acid (DHB),  $\alpha$ -cyano-4-hydroxycinnamic acid (CCA), and sinapinic acid (SA) in positive ion mode, while 1-naphthylhydrazine hydrochloride (NHHC), N-(1-naphthyl) ethylenediamine dihydrochloride (NEDC), and 9-aminoacridine (9AA) in negative ion mode. Urine samples from HC and GU cancer patients were tested respectively for evaluating the performance of matrices. As shown in Fig. S1, we found that SA in positive ion mode and NHHC in negative ion mode helped mass spectrometer capture the richest signals. However, the targeted signals were buried under strong background noise of SA (Fig. S1e), and therefore identification became difficult. Besides, due to its strong ultraviolet absorption and low background interference in the low molecular weight region, NHHC can sensitively analyse small molecules such as homogentisic acid in the urine, even in saturated NaCl solution according to the previous work of our group<sup>1</sup>. NHHC is a hydrochloride, whose crystal size is smaller, the “sweet spot” effect is weaker and the signal intensity is more stable. Moreover, urinary metabolites contain a large number of small-molecule organic acids<sup>2</sup>, which are prone to be negatively charged in MS, so that using negative ion mode can obtain more signals of them. Eventually, we chose NHHC as the matrix of MALDI-MS for urine sample metabolic analysis in negative ion mode.

## Mass spectrometry analysis

3-Chloro-L-phenylalanine was introduced as the internal standard for quantification use in urine MALDI MS. 1  $\mu$ L urine sample was mixed with 1  $\mu$ L 10mg/mL NHHC (50%MeOH) and 1  $\mu$ L of internal standard aqueous solution, then 1  $\mu$ L of the mixture was deposited on a MALDI plate and allowed to dry at room temperature for consequent MALDI- MS analysis.

Mass spectra of urine samples were collected in negative ion mode over the mass range of 0–1000 Da. A total of 351 mass spectra collected were summarized and  $m/z$  were aligned. All the data were normalized using the signal intensity of [IS-H]<sup>-</sup> ( $m/z$  198.0). The number of occurrences of each  $m/z$  in all spectra was calculated, and those less than 234 ( $351 \times 2/3$ ) were eliminated. Subsequently, the matrix background was checked and tested 30 times in parallel,

and the  $m/z$  features with the top eight highest abundance were eliminated. And then 318  $m/z$  features were obtained, which were used as a basis for subsequent statistical analysis.

Matrix-assisted laser desorption/ionization mass spectrometry (MALDI-MS) was performed on an Ultraflex extreme MALDI-TOF/TOF-MS (Bruker Daltonics, Billerica, MA) equipped with a smartbeam (Nd: YAG 355 nm) laser. Oligosaccharides were used for mass calibration in negative ion mode before each run, including D-glucose (MW: 180.16), maltose (MW: 342.30), 1-kestose (MW: 504.4), nystose (MW: 666.6), 1,1,1-kestopentaose (MW: 828.7), fructo-oligosaccharide DP6 (MW: 990.86). 1-Naphthylhydrazine hydrochloride (NHHC, 10mg/mL in 50%MeOH) was used as a matrix. The mass spectra were recorded at an accelerating voltage of 19 kV, a reflection voltage of 20 kV, and the laser spot and laser pulse energy were adjusted to the optimal condition to obtain the best signal. Data acquisition was carried out using the FlexImaging 4.0 software provided by Bruker Daltonics.

Matrix-assisted laser desorption/ionization fourier transform ion cyclotron resonance mass spectrometer (MALDI-FTICR-MS, SolariX; 15 T, Bruker Daltonics, Bremen, Germany) was utilized to accurate mass measurements and chemical formula assignments of each peak in negative ion mode.

LC-MS/MS was utilized to verify the structures of some of the metabolites. Instruments: ultra-high pressure liquid phase (UltiMate 3000, THERMO), high-resolution mass spectrometry (5600 QTOF, AB SCIEX), chromatographic column (ACQUITY UPLC HSS T3 1.8  $\mu$  m 2.1  $\times$  100 mm, Waters).

## Statistical analysis

The two-tailed test was performed to calculate the p values with FDR-corrected using the MetaboAnalyst 5.0. FC analysis and OPLS-DA were also performed using the MetaboAnalyst 5.0. Heatmaps were constructed using the OmicStudio tools at <https://www.omicstudio.cn/tool>. Machine learning analysis was conducted using Orange (Version 3.27.1).

## Equations

The AUC, Accuracy, F1-score, Precision, and Recall were used to evaluate the classifier, which could be calculated with true positive (TP), false positive (FP), true negative (TN), and

false negative (FN). The F1-score is a measure of a model's accuracy on a dataset, which is used to evaluate binary classification systems. The formula for the standard F1-score is the harmonic mean of the precision and recall.

The equations are as follows:

$$Accuracy = \frac{TP + TN}{TP + FP + TN + FN}$$

$$F1 = \frac{2 * Precision * Recall}{Precision + Recall}$$

$$Precision = \frac{TP}{TP + FP}$$

$$Recall = Sensitivity = \frac{TP}{TP + FN}$$

## **Ethics statement**

All experiments in this study were performed in compliance with relevant laws or guidelines. This study was carried out following relevant ethical regulations and guidelines of the Hospital Scientific Research Ethics Committee of First Affiliated Hospital of Gannan Medical University. This project was reviewed by the Hospital Scientific Research Ethics Committee of First Affiliated Hospital of Gannan Medical University and agreed to apply for research projects in line with the relevant provisions on biological human trials in the “measures for Ethical Review of Biomedical Research involving Human beings” of the Health Commission and the relevant provisions of the Ministry of Science and Technology’s “guiding opinions on being kind to Experimental Animals”. And informed consent was obtained from all human subjects.

## **Data availability**

The data that support the findings of this study and Python codes are available from the corresponding author upon reasonable request.

## **Author contributions**

Z.N. initiated the proposal; X.W., Y.L., H.L. and Z.N. designed research; X.W., J.F. performed research; X.W., L.H., and J.C. analyzed data; X.W., H.L. and Z.N. wrote the paper.

## **Acknowledgements**

This work was supported by grants from the National Natural Sciences Foundation of China (Grant Nos. 21625504, 21827807, and 21790390/21790392) and Chinese Academy of Sciences.

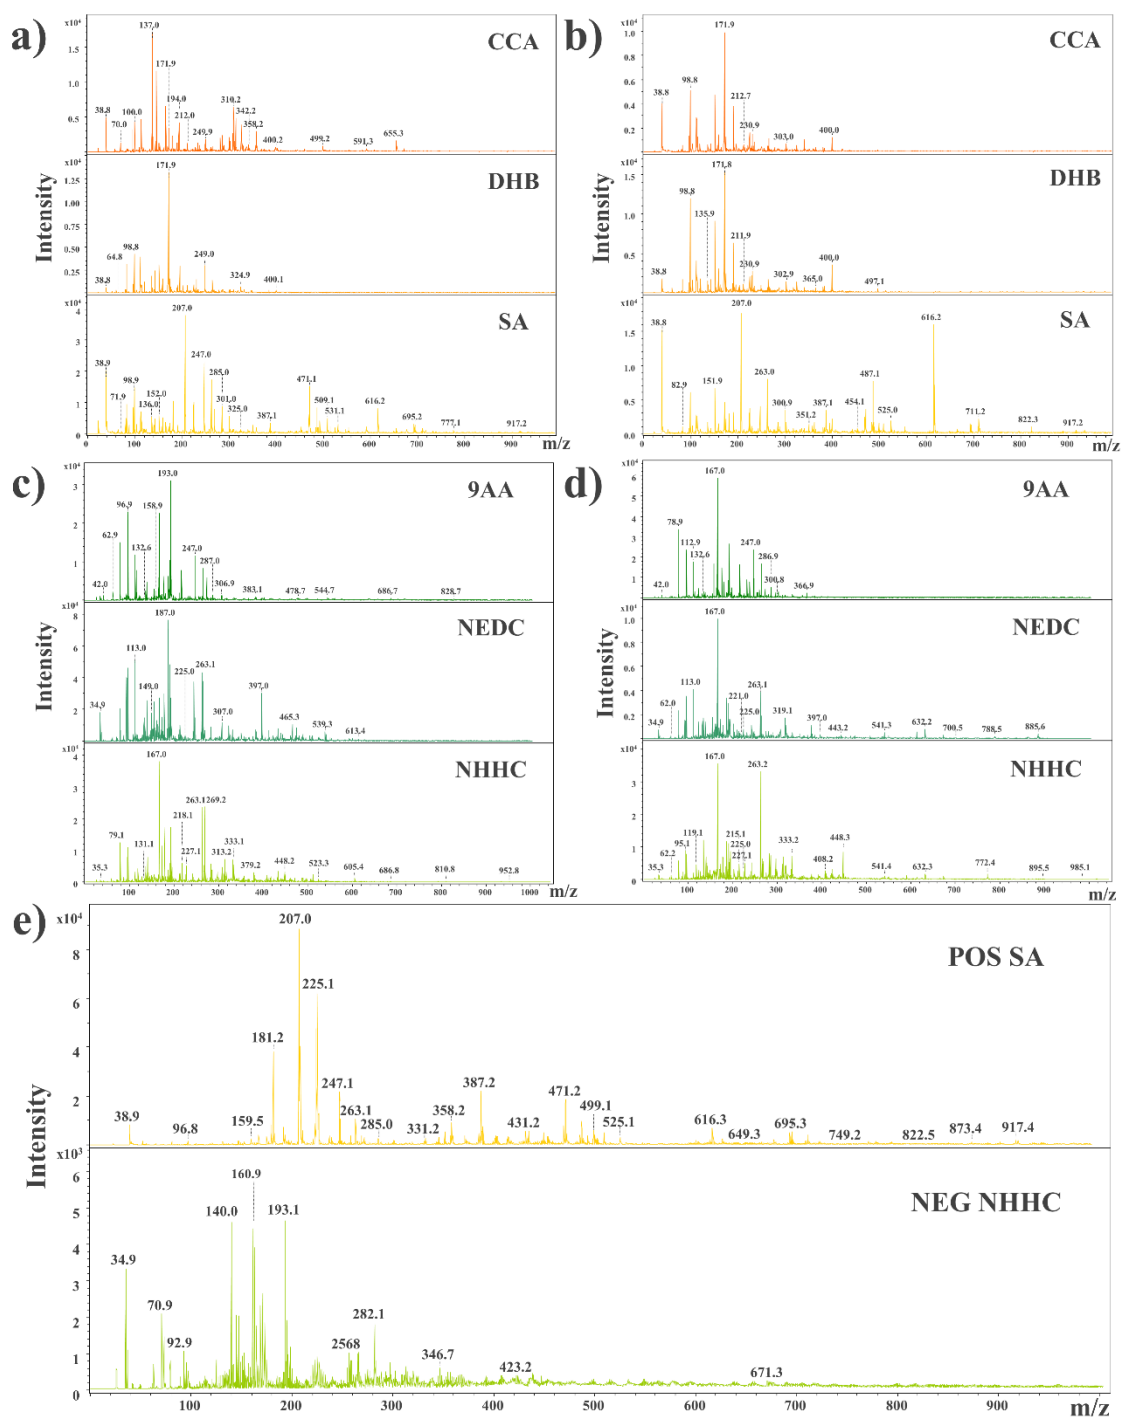

**Fig. S1** Comparison of different matrices. Mass spectra of urine samples from **a)** healthy control (HC) individuals and **b)** genitourinary (GU) cancer patients using CCA, DHB, and SA in positive ion mode. Mass spectra of urine samples from **c)** healthy control (HC) individuals and **d)** genitourinary (GU) cancers using 9AA, NEDC, and NHHC in negative ion mode. **e)** The background mass spectra of SA (10mg/mL, 50% MeOH) in positive ion mode and NHHC (10mg/mL, 50% MeOH) in negative ion mode, respectively.

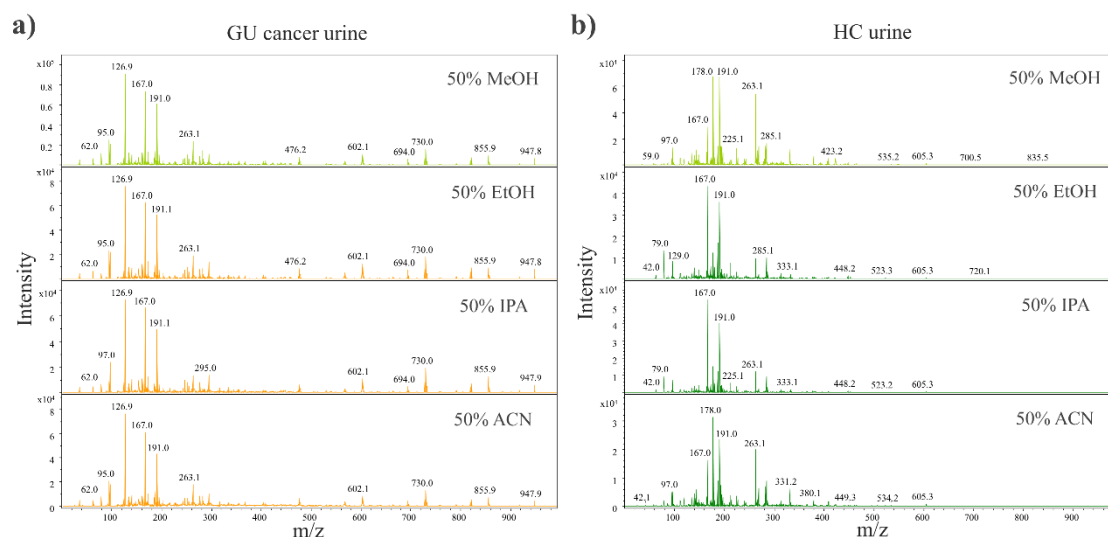

**Fig. S2** Comparison of different solvents for preparing NHHC solutions. Mass spectrum of urine samples from **a)** genitourinary (GU) cancers and **b)** healthy control (HC) individuals using methanol, ethanol, isopropanol, acetonitrile, and water as solvents of NHHC matrices solutions in negative ion mode.

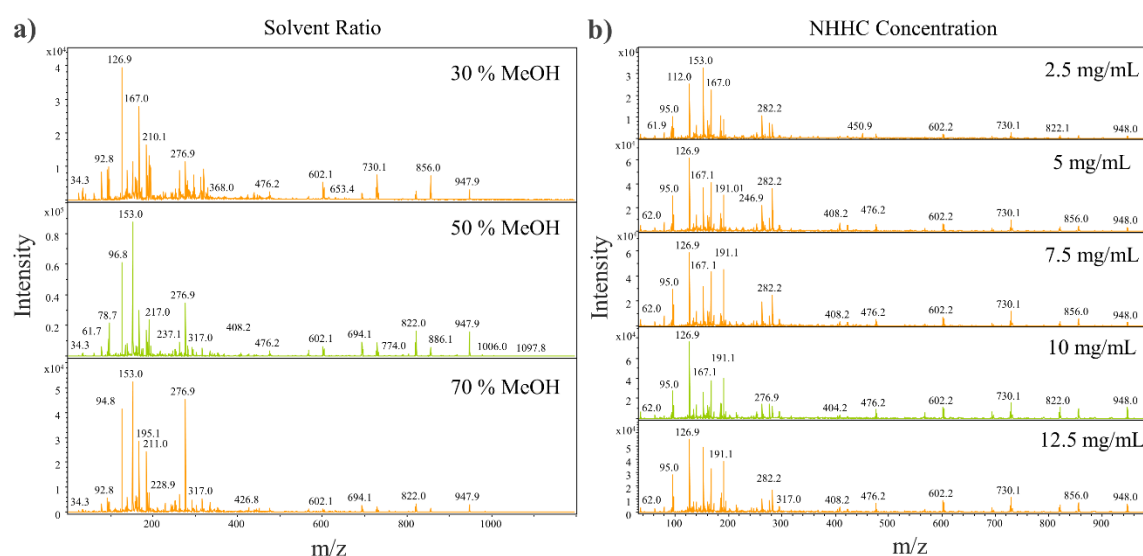

**Fig. S3** Comparison of different ratios of MeOH/H<sub>2</sub>O and different NHHC concentrations. Mass spectrum of a randomly selected GU urine sample using different **a)** ratio of MeOH/H<sub>2</sub>O and **b)** NHHC concentrations (50% MeOH as solvent).



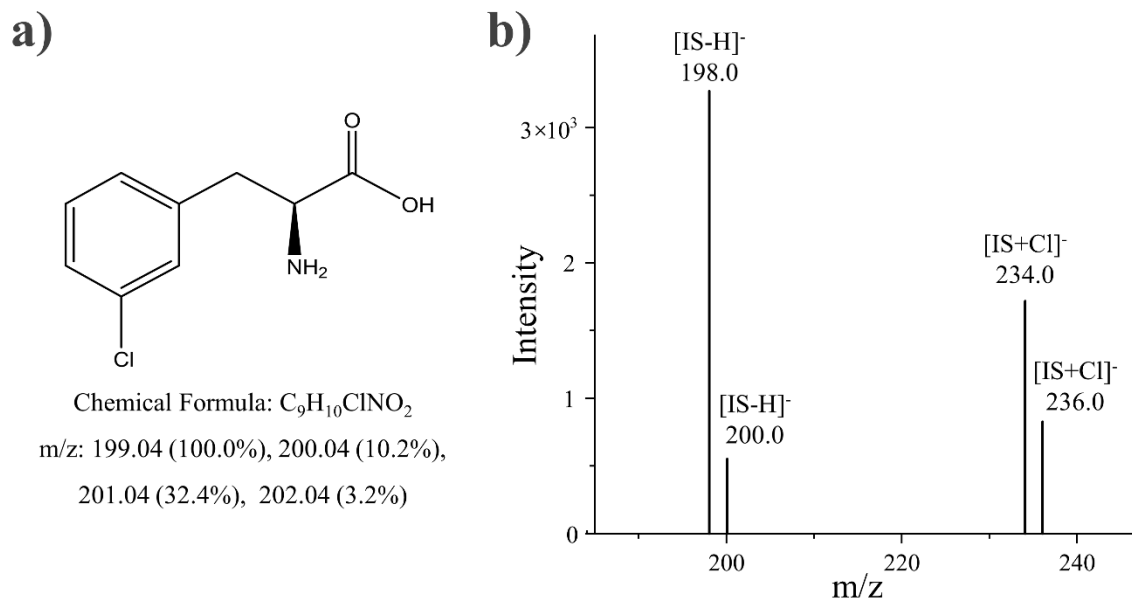

**Fig. S4 a)** Structure of L-Phe(3-Cl)-OH. **b)** Mass spectrum of 8mM L-Phe(3-Cl)-OH (50% MeOH) in negative ion mode. In negative ion mode mass spectrometry analysis, L-Phe(3-Cl)-OH was detected at  $m/z$  198.0 / 200.0 as  $[M-H]^-$  and  $m/z$  234.0 / 236.0 as  $[M+Cl]^-$  respectively.

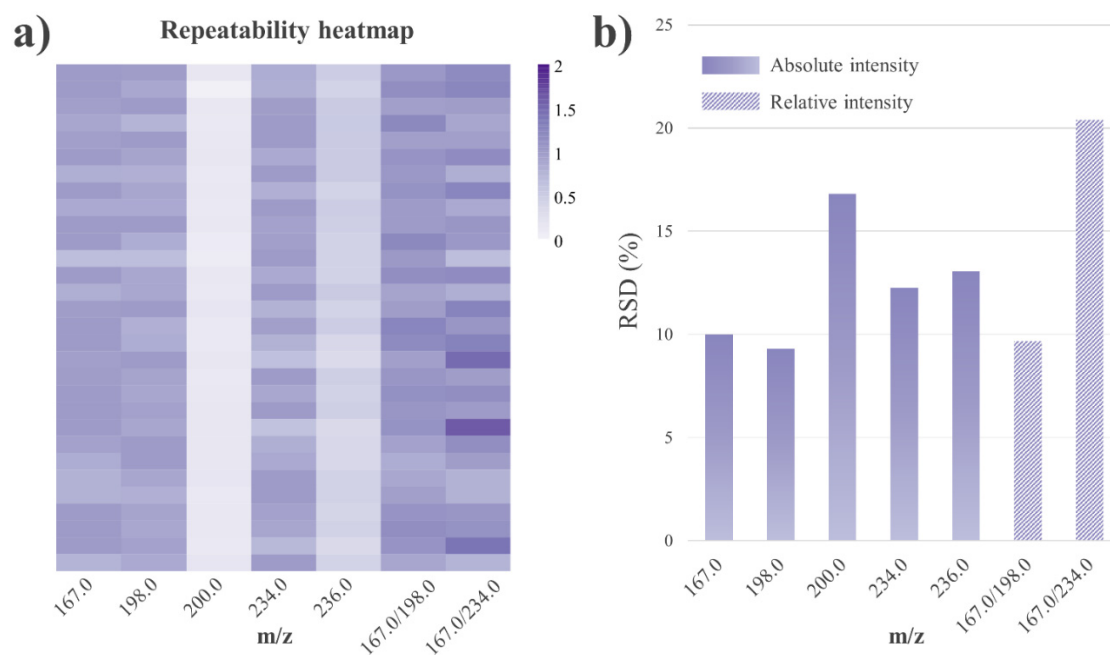

**Fig. S5** The relatively quantitative ability of internal standard. **a)** Repeatability heatmap of uric acid (UA) and internal standard (IS) signal intensities. **b)** The relative standard deviation (RSD) of signal intensities.  $m/z$  167.0:  $[UA-H]^-$ ,  $m/z$  198.0 / 200.0:  $[IS-H]^-$ ,  $m/z$  234.0 / 236.0:  $[IS+Cl]^-$ . This experiment was repeated 30 times.

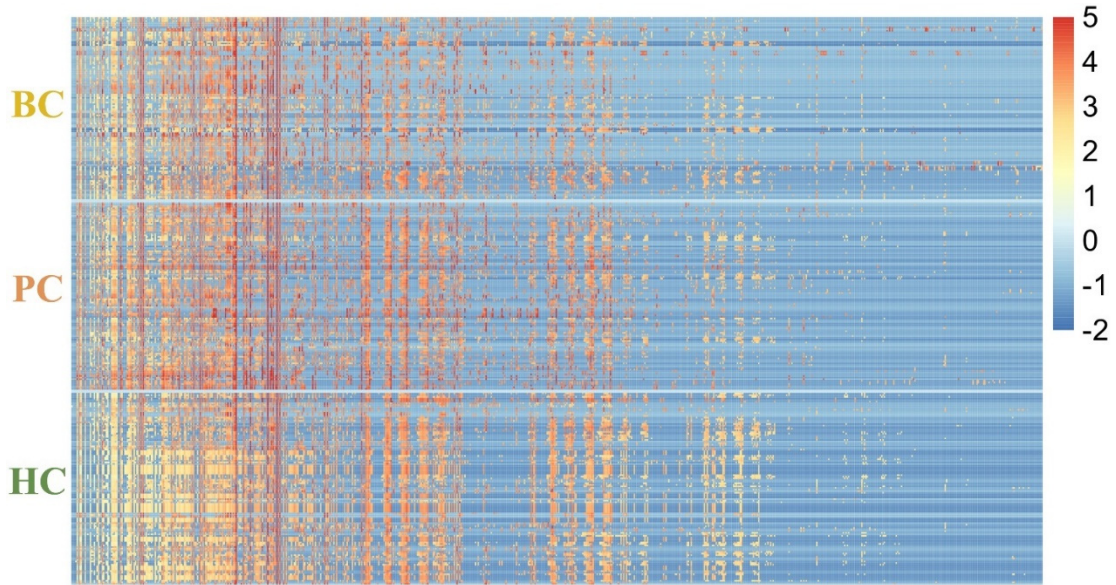

**Fig. S6** Heatmap of 117 urine samples (38 BC, 39 PC, and 40 HC) with 351 mass spectra data.

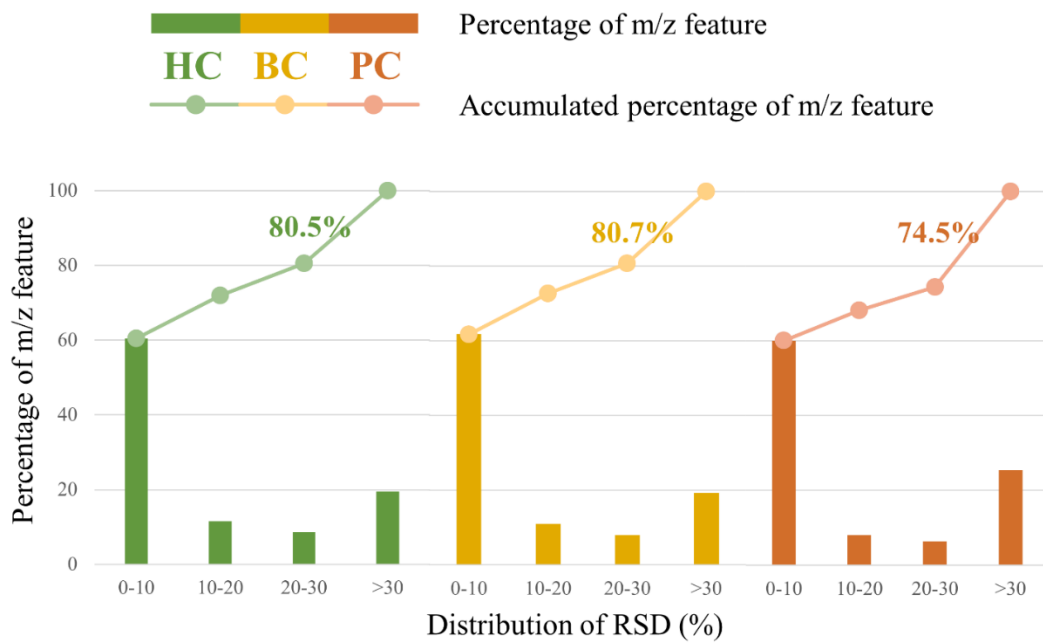

**Fig. S7** RSD distributions of  $m/z$  features in BC, PC, and HC groups.

**Table S1.** Metabolites in urine detected in negative ion mode using MALDI-FTICR-MS.

| Name                        | Formula                                                       | Theoretical<br><i>m/z</i> | Experimental<br><i>m/z</i> | Delta<br>(ppm) | Adduct                              | HMDB ID     |
|-----------------------------|---------------------------------------------------------------|---------------------------|----------------------------|----------------|-------------------------------------|-------------|
| Ribonic acid                | C <sub>5</sub> H <sub>10</sub> O <sub>6</sub>                 | 165.04046                 | 165.041                    | 3.272          | [M-H] <sup>-</sup>                  | HMDB0000867 |
| Quinolinic acid‡            | C <sub>7</sub> H <sub>5</sub> NO <sub>4</sub>                 | 166.01458                 | 166.013                    | 9.517          | [M-H] <sup>-</sup>                  | HMDB0000232 |
| Uric acid*‡                 | C <sub>5</sub> H <sub>4</sub> N <sub>4</sub> O <sub>3</sub>   | 167.02106                 | 167.021                    | 0.359          | [M-H] <sup>-</sup>                  | HMDB0000289 |
| Citric acid*†‡              | C <sub>6</sub> H <sub>8</sub> O <sub>7</sub>                  | 173.00861                 | 173.009                    | 2.254          | [M-H <sub>2</sub> O-H] <sup>-</sup> | HMDB0000094 |
|                             |                                                               | 191.01973                 | 191.020                    | 1.413          | [M-H] <sup>-</sup>                  |             |
| Ascorbic acid*†‡            | C <sub>6</sub> H <sub>8</sub> O <sub>6</sub>                  | 175.02481                 | 175.025                    | 1.086          | [M-H] <sup>-</sup>                  | HMDB0000044 |
| Hippuric acid†‡             | C <sub>9</sub> H <sub>9</sub> NO <sub>3</sub>                 | 178.05097                 | 178.051                    | 0.168          | [M-H] <sup>-</sup>                  | HMDB0000714 |
| Glucose*†‡                  | C <sub>6</sub> H <sub>12</sub> O <sub>6</sub>                 | 179.05611                 | 179.056                    | 0.614          | [M-H] <sup>-</sup>                  | HMDB0000122 |
| Inositol*†‡                 |                                                               |                           |                            |                |                                     | HMDB0000211 |
| 1-Methyluric acid‡          | C <sub>6</sub> H <sub>6</sub> N <sub>4</sub> O <sub>3</sub>   | 181.03671                 | 181.037                    | 1.602          | [M-H] <sup>-</sup>                  | HMDB0003099 |
| Hydroxyphenyllactic acid‡   | C <sub>9</sub> H <sub>10</sub> O <sub>4</sub>                 | 181.05063                 | 181.051                    | 2.044          | [M-H] <sup>-</sup>                  | HMDB0000755 |
| L-Tryptophan‡               | C <sub>11</sub> H <sub>12</sub> N <sub>2</sub> O <sub>2</sub> | 185.07149                 | 185.072                    | 2.756          | [M-H <sub>2</sub> O-H] <sup>-</sup> | HMDB0000929 |
| p-Tolyl Sulfate‡            | C <sub>7</sub> H <sub>8</sub> O <sub>4</sub> S                | 187.00705                 | 187.007                    | 0.267          | [M-H] <sup>-</sup>                  | /           |
| 3-Hydroxyanthranilic acid†‡ | C <sub>7</sub> H <sub>7</sub> NO <sub>3</sub>                 | 188.01200                 | 188.010                    | 10.638         | [M+Cl] <sup>-</sup>                 | HMDB0001476 |
| 2-O-Methylascorbic acid†    | C <sub>7</sub> H <sub>10</sub> O <sub>6</sub>                 | 189.04046                 | 189.040                    | 2.433          | [M-H] <sup>-</sup>                  | HMDB0240294 |
| Glucuronic acid*‡           | C <sub>6</sub> H <sub>10</sub> O <sub>7</sub>                 | 193.03538                 | 193.035                    | 1.969          | [M-H] <sup>-</sup>                  | HMDB0000127 |
| 3-Hydroxyhippuric acid*‡    |                                                               |                           |                            |                | [M-H] <sup>-</sup>                  | HMDB0006116 |
| 4-Hydroxyhippuric acid*‡    | C <sub>9</sub> H <sub>9</sub> NO <sub>4</sub>                 | 194.04588                 | 194.046                    | 0.618          | [M-H] <sup>-</sup>                  | HMDB0013678 |
| Salicyluric acid*‡          |                                                               |                           |                            |                | [M-H] <sup>-</sup>                  | HMDB0000840 |

|                                                |                                                               |           |         |       |                     |             |
|------------------------------------------------|---------------------------------------------------------------|-----------|---------|-------|---------------------|-------------|
| Gluconic acid*‡                                | C <sub>6</sub> H <sub>12</sub> O <sub>7</sub>                 | 195.05103 | 195.051 | 0.154 | [M-H] <sup>-</sup>  | HMDB0000625 |
| Tryptophol†‡                                   | C <sub>10</sub> H <sub>11</sub> NO                            | 196.05347 | 196.054 | 2.703 | [M+Cl] <sup>-</sup> | HMDB0003447 |
| 6-amino-5[N-methylformylamino]-1-methyluracil† | C <sub>7</sub> H <sub>10</sub> N <sub>4</sub> O <sub>3</sub>  | 197.06801 | 197.068 | 0.051 | [M-H] <sup>-</sup>  | HMDB0059771 |
| O-methoxycatechol-O-sulphate                   | C <sub>7</sub> H <sub>8</sub> O <sub>5</sub> S                | 203.00197 | 203.002 | 0.148 | [M-H] <sup>-</sup>  | HMDB0060013 |
| 2-Methylcitric acid†                           | C <sub>7</sub> H <sub>10</sub> O <sub>7</sub>                 | 205.03538 | 205.035 | 1.853 | [M-H] <sup>-</sup>  | HMDB0000379 |
| 5-(3',4'-Dihydroxyphenyl)-gamma-valerolactone* | C <sub>11</sub> H <sub>12</sub> O <sub>4</sub>                | 207.06628 | 207.066 | 1.352 | [M-H] <sup>-</sup>  | HMDB0029185 |
| N-Benzyloxycarbonylglycine‡                    | C <sub>10</sub> H <sub>11</sub> NO <sub>4</sub>               | 208.06153 | 208.062 | 2.259 | [M-H] <sup>-</sup>  | HMDB0000735 |
| Indoxyl sulfate†‡                              | C <sub>8</sub> H <sub>7</sub> NO <sub>4</sub> S               | 212.00230 | 212.002 | 1.415 | [M-H] <sup>-</sup>  | HMDB0000682 |
| 8-Hydroxy-7-methylguanine†                     | C <sub>6</sub> H <sub>7</sub> N <sub>5</sub> O <sub>2</sub>   | 216.02938 | 216.028 | 6.388 | [M+Cl] <sup>-</sup> | HMDB0006037 |
| Porphobilinogen†‡                              | C <sub>10</sub> H <sub>14</sub> N <sub>2</sub> O <sub>4</sub> | 225.08808 | 225.088 | 0.355 | [M-H] <sup>-</sup>  | HMDB0000245 |
| Prolylhydroxyproline†‡                         | C <sub>10</sub> H <sub>16</sub> N <sub>2</sub> O <sub>4</sub> | 227.10373 | 227.104 | 1.189 | [M-H] <sup>-</sup>  | HMDB0006695 |
| Paracetamol sulfate                            | C <sub>8</sub> H <sub>9</sub> NO <sub>5</sub> S               | 230.01287 | 230.013 | 0.565 | [M-H] <sup>-</sup>  | HMDB0059911 |
| methyl 3-(1H-indol-3-yl) propanoate‡           | C <sub>12</sub> H <sub>13</sub> NO <sub>2</sub>               | 238.06403 | 238.066 | 8.275 | [M+Cl] <sup>-</sup> | HMDB0240623 |
| Ibuprofen†‡                                    | C <sub>13</sub> H <sub>18</sub> O <sub>2</sub>                | 241.10008 | 241.098 | 8.627 | [M+Cl] <sup>-</sup> | HMDB0001925 |
| Pseudouridine‡                                 | C <sub>9</sub> H <sub>12</sub> N <sub>2</sub> O <sub>6</sub>  | 243.06226 | 243.062 | 1.070 | [M-H] <sup>-</sup>  | HMDB0000767 |
| Uridine‡                                       | C <sub>9</sub> H <sub>12</sub> N <sub>2</sub> O <sub>6</sub>  | 243.06226 | 243.062 | 1.070 | [M-H] <sup>-</sup>  | HMDB0000296 |
| N-acetyltryptophan‡                            | C <sub>13</sub> H <sub>14</sub> N <sub>2</sub> O <sub>3</sub> | 245.09317 | 245.093 | 0.694 | [M-H] <sup>-</sup>  | HMDB0013713 |
| Propenoylcarnitine*                            | C <sub>10</sub> H <sub>17</sub> NO <sub>4</sub>               | 250.08516 | 250.084 | 4.638 | [M+Cl] <sup>-</sup> | HMDB0013124 |
| Ribothymidine*‡                                | C <sub>10</sub> H <sub>14</sub> N <sub>2</sub> O <sub>6</sub> | 257.07791 | 257.078 | 0.350 | [M-H] <sup>-</sup>  | HMDB0000884 |
| 3-Methyluridine*‡                              | C <sub>10</sub> H <sub>14</sub> N <sub>2</sub> O <sub>6</sub> | 257.07791 | 257.078 | 0.350 | [M-H] <sup>-</sup>  | HMDB0004813 |

|                                                        |                                                                              |           |         |       |                                     |             |
|--------------------------------------------------------|------------------------------------------------------------------------------|-----------|---------|-------|-------------------------------------|-------------|
| 3-hydroxy-3-(3-hydroxyphenyl)propanoic acid-O-sulphate | C <sub>9</sub> H <sub>10</sub> O <sub>7</sub> S                              | 261.00745 | 261.007 | 1.724 | [M-H] <sup>-</sup>                  | HMDB0059967 |
| Phenylacetylglutamine‡                                 | C <sub>13</sub> H <sub>16</sub> N <sub>2</sub> O <sub>4</sub>                | 263.10373 | 263.104 | 1.026 | [M-H] <sup>-</sup>                  | HMDB0006344 |
| Melatonin‡                                             | C <sub>13</sub> H <sub>16</sub> N <sub>2</sub> O <sub>2</sub>                | 267.09058 | 267.093 | 9.061 | [M+Cl] <sup>-</sup>                 | HMDB0001389 |
| 2-(4-hydroxyphenyl)chromenylium-3,5,7-triol†           | C <sub>15</sub> H <sub>11</sub> O <sub>5</sub>                               | 269.04610 | 269.046 | 0.372 | [M-H] <sup>-</sup>                  | HMDB0003263 |
| Aspartylphenylalanine*‡                                | C <sub>13</sub> H <sub>16</sub> N <sub>2</sub> O <sub>5</sub>                | 279.09865 | 279.099 | 1.254 | [M-H] <sup>-</sup>                  | HMDB0000706 |
| S-3-oxodecanoyl cysteamine                             | C <sub>12</sub> H <sub>23</sub> NO <sub>2</sub> S                            | 280.11435 | 280.113 | 4.819 | [M+Cl] <sup>-</sup>                 | HMDB0059773 |
| (R)-3-hydroxybutyrylcarnitine                          | C <sub>11</sub> H <sub>21</sub> NO <sub>5</sub>                              | 282.11138 | 282.112 | 2.198 | [M+Cl] <sup>-</sup>                 | HMDB0062735 |
| p-Cresol glucuronide                                   | C <sub>13</sub> H <sub>16</sub> O <sub>7</sub>                               | 283.08233 | 283.082 | 1.166 | [M-H] <sup>-</sup>                  | HMDB0011686 |
| 7-Hydroxyetodolac†                                     | C <sub>17</sub> H <sub>21</sub> NO <sub>4</sub>                              | 284.12867 | 284.127 | 5.878 | [M-H <sub>2</sub> O-H] <sup>-</sup> | HMDB0060544 |
| 6-Hydroxyetodolac†                                     | C <sub>17</sub> H <sub>21</sub> NO <sub>4</sub>                              | 284.12867 | 284.127 | 5.878 | [M-H <sub>2</sub> O-H] <sup>-</sup> | HMDB0060543 |
| Diphenol glucuronide†                                  | C <sub>12</sub> H <sub>14</sub> O <sub>8</sub>                               | 285.06159 | 285.062 | 1.438 | [M-H] <sup>-</sup>                  | HMDB0059998 |
| 5'-(3',4'-Dihydroxyphenyl)-gamma-valerolactone sulfate | C <sub>11</sub> H <sub>12</sub> O <sub>7</sub> S                             | 287.02310 | 287.023 | 0.348 | [M-H] <sup>-</sup>                  | HMDB0029191 |
| Canavaninosuccinate                                    | C <sub>9</sub> H <sub>16</sub> N <sub>4</sub> O <sub>7</sub>                 | 291.09462 | 291.093 | 5.565 | [M-H] <sup>-</sup>                  | HMDB0012197 |
| Didemethylcitalopram                                   | C <sub>18</sub> H <sub>17</sub> FN <sub>2</sub> O                            | 295.12522 | 295.124 | 4.134 | [M-H] <sup>-</sup>                  | HMDB0060472 |
| 5'-Methylthioadenosine*‡                               | C <sub>11</sub> H <sub>15</sub> N <sub>5</sub> O <sub>3</sub> S              | 296.08228 | 296.080 | 7.701 | [M-H] <sup>-</sup>                  | HMDB0001173 |
| 7C-aglycone†                                           | C <sub>18</sub> H <sub>18</sub> O <sub>4</sub>                               | 297.11323 | 297.112 | 4.140 | [M-H] <sup>-</sup>                  | HMDB0004808 |
| Nilutamide‡                                            | C <sub>12</sub> H <sub>10</sub> F <sub>3</sub> N <sub>3</sub> O <sub>4</sub> | 298.04395 | 298.043 | 3.187 | [M-H <sub>2</sub> O-H] <sup>-</sup> | HMDB0014803 |
| beta-D-3-Ribofuranosyluric acid                        | C <sub>10</sub> H <sub>12</sub> N <sub>4</sub> O <sub>7</sub>                | 299.06332 | 299.063 | 1.070 | [M-H] <sup>-</sup>                  | HMDB0029920 |
| N-Acetylaspartylglutamic acid*†‡                       | C <sub>11</sub> H <sub>16</sub> N <sub>2</sub> O <sub>8</sub>                | 303.08339 | 303.083 | 1.287 | [M-H] <sup>-</sup>                  | HMDB0001067 |

|                                                             |                                                                 |           |         |       |                                     |             |
|-------------------------------------------------------------|-----------------------------------------------------------------|-----------|---------|-------|-------------------------------------|-------------|
| 4-Hydroxy-5-(dihydroxyphenyl)-valeric acid-O-sulphate       | C <sub>11</sub> H <sub>14</sub> O <sub>8</sub> S                | 305.03366 | 305.034 | 1.115 | [M-H] <sup>-</sup>                  | HMDB0059978 |
| Resveratrol 3-sulfate†                                      | C <sub>14</sub> H <sub>12</sub> O <sub>6</sub> S                | 307.02818 | 307.028 | 0.586 | [M-H] <sup>-</sup>                  | HMDB0041772 |
| N-Acetylneuraminic acid*‡                                   | C <sub>11</sub> H <sub>19</sub> NO <sub>9</sub>                 | 308.09871 | 308.099 | 0.941 | [M-H] <sup>-</sup>                  | HMDB0000230 |
| N2,N2-Dimethylguanosine‡                                    | C <sub>12</sub> H <sub>17</sub> N <sub>5</sub> O <sub>5</sub>   | 310.11569 | 310.116 | 1.000 | [M-H] <sup>-</sup>                  | HMDB0004824 |
| Beta-D-Glucopyranuronic acid†                               | C <sub>13</sub> H <sub>14</sub> O <sub>9</sub>                  | 313.05651 | 313.057 | 1.565 | [M-H] <sup>-</sup>                  | HMDB0010314 |
| Nicotine glucuronide†                                       | C <sub>16</sub> H <sub>22</sub> N <sub>2</sub> O <sub>6</sub>   | 319.12940 | 319.130 | 1.880 | [M-H <sub>2</sub> O-H] <sup>-</sup> | HMDB0001272 |
| N4-Acetylcytidine‡                                          | C <sub>11</sub> H <sub>15</sub> N <sub>3</sub> O <sub>6</sub>   | 320.06549 | 320.063 | 7.780 | [M+Cl] <sup>-</sup>                 | HMDB0005923 |
| trans-isoeugenol-O-glucuronide*                             | C <sub>16</sub> H <sub>20</sub> O <sub>8</sub>                  | 321.09743 | 321.096 | 4.453 | [M-H <sub>2</sub> O-H] <sup>-</sup> | HMDB0060021 |
| Gliclazide‡                                                 | C <sub>15</sub> H <sub>21</sub> N <sub>3</sub> O <sub>3</sub> S | 322.12309 | 322.124 | 2.825 | [M-H] <sup>-</sup>                  | HMDB0015252 |
| Galactosylhydroxylysine*                                    | C <sub>12</sub> H <sub>24</sub> N <sub>2</sub> O <sub>8</sub>   | 323.14599 | 323.146 | 0.031 | [M-H] <sup>-</sup>                  | HMDB0000600 |
| Dihydroxy-1H-indole glucuronide I                           | C <sub>14</sub> H <sub>15</sub> NO <sub>8</sub>                 | 324.07249 | 324.073 | 1.574 | [M-H] <sup>-</sup>                  | HMDB0059997 |
| Hydroxyhexamide*                                            | C <sub>15</sub> H <sub>22</sub> N <sub>2</sub> O <sub>4</sub> S | 325.12275 | 325.122 | 2.307 | [M-H] <sup>-</sup>                  | HMDB0060610 |
| Acetaminophen glucuronide†                                  | C <sub>14</sub> H <sub>17</sub> NO <sub>8</sub>                 | 326.08814 | 326.088 | 0.429 | [M-H] <sup>-</sup>                  | HMDB0010316 |
| mono(2-ethyl-5-hydroxyhexyl) phthalate†                     | C <sub>16</sub> H <sub>22</sub> O <sub>5</sub>                  | 329.11613 | 329.114 | 6.472 | [M+Cl] <sup>-</sup>                 | HMDB0094679 |
| Neomenthol-glucuronide†                                     | C <sub>16</sub> H <sub>28</sub> O <sub>7</sub>                  | 331.17623 | 331.176 | 0.694 | [M-H] <sup>-</sup>                  | HMDB0060012 |
| 4'-O-Methyl(-)-epicatechin-7-O-sulphate                     |                                                                 |           |         |       |                                     | HMDB0029184 |
| 4'-O-Methyl(-)-epicatechin-5-O-sulphate                     | C <sub>16</sub> H <sub>16</sub> O <sub>7</sub> S                | 333.04328 | 333.044 | 2.162 | [M-H <sub>2</sub> O-H] <sup>-</sup> | HMDB0029182 |
| 3'-O-Methyl(-)-epicatechin-5-O-sulphate                     |                                                                 |           |         |       |                                     | HMDB0029176 |
| 4-Hydroxy-5-(dihydroxyphenyl)-valerate-O-methyl-O-sulfate*† | C <sub>12</sub> H <sub>16</sub> O <sub>9</sub> S                | 335.04423 | 335.043 | 3.671 | [M-H] <sup>-</sup>                  | HMDB0059977 |
| Enterodiol‡                                                 | C <sub>18</sub> H <sub>22</sub> O <sub>4</sub>                  | 337.12121 | 337.122 | 2.343 | [M+Cl] <sup>-</sup>                 | HMDB0005056 |

|                                                                          |                                                               |           |         |       |                                     |             |
|--------------------------------------------------------------------------|---------------------------------------------------------------|-----------|---------|-------|-------------------------------------|-------------|
| 11-Ketoetiocholanolone                                                   | C <sub>19</sub> H <sub>28</sub> O <sub>3</sub>                | 339.17325 | 339.172 | 3.685 | [M+Cl] <sup>-</sup>                 | HMDB0006031 |
| Epinephrine glucuronide*                                                 | C <sub>15</sub> H <sub>21</sub> NO <sub>9</sub>               | 340.10324 | 340.104 | 2.235 | [M-H <sub>2</sub> O-H] <sup>-</sup> | HMDB0010336 |
| Trehalose*†‡                                                             | C <sub>12</sub> H <sub>22</sub> O <sub>11</sub>               | 341.10843 | 341.108 | 1.261 | [M-H] <sup>-</sup>                  | HMDB0000975 |
| Testosterone sulfate                                                     | C <sub>19</sub> H <sub>28</sub> O <sub>5</sub> S              | 377.08561 | 377.086 | 1.034 | [M+Cl] <sup>-</sup>                 | HMDB0002833 |
| Chlorogenic acid*                                                        | C <sub>16</sub> H <sub>18</sub> O <sub>9</sub>                | 349.14736 | 349.146 | 3.895 | [M-H <sub>2</sub> O-H] <sup>-</sup> | HMDB0002833 |
| Succinylaminoimidazole carboxamide<br>riboside                           | C <sub>16</sub> H <sub>18</sub> O <sub>9</sub>                | 353.08781 | 353.091 | 9.035 | [M-H] <sup>-</sup>                  | HMDB0003164 |
| Riboflavin*†‡                                                            | C <sub>13</sub> H <sub>18</sub> N <sub>4</sub> O <sub>9</sub> | 355.08899 | 355.088 | 2.788 | [M-H <sub>2</sub> O-H] <sup>-</sup> | HMDB0240295 |
| 3-Methoxy-4-hydroxyphenylglycol<br>glucuronide                           | C <sub>17</sub> H <sub>20</sub> N <sub>4</sub> O <sub>6</sub> | 357.11989 | 357.119 | 2.492 | [M-H <sub>2</sub> O-H] <sup>-</sup> | HMDB0000244 |
| 2'-alpha-Mannosyl-L-tryptophan*                                          | C <sub>15</sub> H <sub>20</sub> O <sub>10</sub>               | 359.09837 | 359.099 | 1.754 | [M-H] <sup>-</sup>                  | HMDB0000496 |
| Androsterone sulfate†‡                                                   | C <sub>17</sub> H <sub>22</sub> N <sub>2</sub> O <sub>7</sub> | 401.11210 | 401.109 | 7.729 | [M+Cl] <sup>-</sup>                 | HMDB0240296 |
| Dihydroferulic acid 4-O-glucuronide*†                                    | C <sub>19</sub> H <sub>30</sub> O <sub>5</sub> S              | 369.17412 | 369.174 | 0.325 | [M-H] <sup>-</sup>                  | HMDB0002759 |
| Casticin‡                                                                | C <sub>16</sub> H <sub>20</sub> O <sub>10</sub>               | 371.09837 | 371.099 | 1.698 | [M-H] <sup>-</sup>                  | HMDB0041723 |
| D-Maltose                                                                | C <sub>19</sub> H <sub>18</sub> O <sub>8</sub>                | 373.09289 | 373.090 | 7.746 | [M-H] <sup>-</sup>                  | HMDB0030660 |
| hesperetin 3'-O-sulfate                                                  | C <sub>12</sub> H <sub>22</sub> O <sub>11</sub>               | 377.08561 | 377.086 | 1.034 | [M+Cl] <sup>-</sup>                 | HMDB0000163 |
| UDP-D-Xylose†                                                            | C <sub>16</sub> H <sub>14</sub> O <sub>9</sub> S              | 381.02858 | 381.030 | 3.727 | [M-H] <sup>-</sup>                  | HMDB0029202 |
| N-Acetylserotonin glucuronide                                            | C <sub>16</sub> H <sub>20</sub> N <sub>2</sub> O <sub>7</sub> | 387.09645 | 387.093 | 8.913 | [M+Cl] <sup>-</sup>                 | HMDB0001013 |
| Aldosterone*                                                             | C <sub>18</sub> H <sub>22</sub> N <sub>2</sub> O <sub>8</sub> | 393.13034 | 393.129 | 3.409 | [M-H] <sup>-</sup>                  | HMDB0060833 |
| 5-(3',5'-Dihydroxyphenyl)-gamma-<br>valerolactone-O-glucuronide-O-methyl | C <sub>21</sub> H <sub>28</sub> O <sub>5</sub>                | 395.16308 | 395.164 | 2.328 | [M+Cl] <sup>-</sup>                 | HMDB0000037 |
|                                                                          | C <sub>18</sub> H <sub>22</sub> O <sub>10</sub>               | 397.11402 | 397.114 | 0.050 | [M-H] <sup>-</sup>                  | HMDB0060030 |

|                                                                              |                                                                                             |           |         |       |                                     |  |             |
|------------------------------------------------------------------------------|---------------------------------------------------------------------------------------------|-----------|---------|-------|-------------------------------------|--|-------------|
| 5-(3',4'-Dihydroxyphenyl)-gamma-valerolactone-4'-O-methyl-3'-O-glucuronide   |                                                                                             |           |         |       |                                     |  | HMDB0059990 |
| 5-(3',4'-Dihydroxyphenyl)-gamma-valerolactone-3'-O-methyl-4'-O-glucuronide   |                                                                                             |           |         |       |                                     |  | HMDB0059988 |
| 5-(3',4'-dihydroxyphenyl)-gamma-valerolactone-3'-O-glucuronide               |                                                                                             |           |         |       |                                     |  | HMDB0029190 |
| Melatonin glucuronide                                                        | C <sub>19</sub> H <sub>24</sub> N <sub>2</sub> O <sub>8</sub>                               | 407.14599 | 407.146 | 0.025 | [M-H] <sup>-</sup>                  |  | HMDB0060830 |
| Pyridinoline*                                                                | C <sub>18</sub> H <sub>28</sub> N <sub>4</sub> O <sub>8</sub>                               | 409.17232 | 409.171 | 3.226 | [M-H <sub>2</sub> O-H] <sup>-</sup> |  | HMDB0000851 |
| Bicalutamide*‡                                                               | C <sub>18</sub> H <sub>14</sub> F <sub>4</sub> N <sub>2</sub> O <sub>4</sub> S              | 411.04265 | 411.043 | 0.851 | [M-H <sub>2</sub> O-H] <sup>-</sup> |  | HMDB0015260 |
| 5-(3',4',5'-trihydroxyphenyl)-gamma-valerolactone-O-methyl-5'-O-glucuronide† | C <sub>18</sub> H <sub>22</sub> O <sub>11</sub>                                             | 413.10894 | 413.109 | 0.145 | [M-H] <sup>-</sup>                  |  | HMDB0060028 |
| 5-(3',4',5'-trihydroxyphenyl)-gamma-valerolactone-O-methyl-4'-O-glucuronide† | C <sub>18</sub> H <sub>22</sub> O <sub>11</sub>                                             | 413.10894 | 413.109 | 0.145 | [M-H] <sup>-</sup>                  |  | HMDB0060027 |
| beta-1,4-Mannosyl-N-acetylglucosamine†                                       | C <sub>14</sub> H <sub>25</sub> NO <sub>11</sub>                                            | 418.11216 | 418.110 | 5.166 | [M+Cl] <sup>-</sup>                 |  | HMDB0006535 |
| Gemcitabine diphosphate                                                      | C <sub>9</sub> H <sub>13</sub> F <sub>2</sub> N <sub>3</sub> O <sub>10</sub> P <sub>2</sub> | 421.99715 | 421.999 | 4.384 | [M-H] <sup>-</sup>                  |  | HMDB0060639 |
| Alfuzosin†‡                                                                  | C <sub>19</sub> H <sub>27</sub> N <sub>5</sub> O <sub>4</sub>                               | 424.17571 | 424.177 | 3.041 | [M+Cl] <sup>-</sup>                 |  | HMDB0014490 |
| Flavoxate*                                                                   | C <sub>24</sub> H <sub>25</sub> NO <sub>4</sub>                                             | 426.14776 | 426.150 | 5.256 | [M+Cl] <sup>-</sup>                 |  | HMDB0015279 |
| Estrone glucuronide*                                                         | C <sub>24</sub> H <sub>30</sub> O <sub>8</sub>                                              | 427.17568 | 427.178 | 5.431 | [M-H <sub>2</sub> O-H] <sup>-</sup> |  | HMDB0004483 |
| 4-Hydroxy-5-(3',4'-dihydroxyphenyl)-valerate-O-methyl-O-glucuronide*†        |                                                                                             |           |         |       |                                     |  | HMDB0059972 |
| 4-Hydroxy-5-(3',5'-dihydroxyphenyl)-valerate-O-methyl-O-glucuronide*†        | C <sub>18</sub> H <sub>26</sub> O <sub>12</sub>                                             | 433.13515 | 433.135 | 0.346 | [M-H] <sup>-</sup>                  |  | HMDB0059974 |
| Estramustine                                                                 | C <sub>23</sub> H <sub>31</sub> Cl <sub>2</sub> NO <sub>3</sub>                             | 438.16082 | 438.161 | 0.411 | [M-H] <sup>-</sup>                  |  | HMDB0015327 |
| 5-Methyltetrahydrofolic acid                                                 | C <sub>20</sub> H <sub>25</sub> N <sub>7</sub> O <sub>6</sub>                               | 440.16824 | 440.166 | 5.089 | [M-H <sub>2</sub> O-H] <sup>-</sup> |  | HMDB0001396 |



|                                           |                                                                |           |         |                     |                                     |             |
|-------------------------------------------|----------------------------------------------------------------|-----------|---------|---------------------|-------------------------------------|-------------|
| 17-Hydroxypregnenolone sulfate            | C <sub>21</sub> H <sub>32</sub> O <sub>6</sub> S               | 447.16136 | 447.162 | 1.431               | [M+Cl] <sup>-</sup>                 | HMDB0000416 |
| Glycoursodeoxycholic acid <sup>†‡</sup>   | C <sub>26</sub> H <sub>43</sub> NO <sub>5</sub>                | 448.30685 | 448.307 | 0.335               | [M-H] <sup>-</sup>                  | HMDB0000708 |
| 17-Hydroxyandrostane-3-glucuronide        | C <sub>25</sub> H <sub>40</sub> O <sub>8</sub>                 | 449.25393 | 449.255 | 2.382               | [M-H <sub>2</sub> O-H] <sup>-</sup> | HMDB0010359 |
| Estriol-3-glucuronide                     | C <sub>24</sub> H <sub>32</sub> O <sub>9</sub>                 | 463.19736 | 463.193 | 9.413               | [M-H] <sup>-</sup>                  | HMDB0010335 |
| Abiraterone sulfate*                      | C <sub>24</sub> H <sub>31</sub> NO <sub>4</sub> S              | 464.16678 | 464.164 | 5.989               | [M+Cl] <sup>-</sup>                 | HMDB0060584 |
| Androsterone glucuronide                  | C <sub>25</sub> H <sub>38</sub> O <sub>8</sub>                 | 465.24939 | 465.249 | 0.838               | [M-H] <sup>-</sup>                  | HMDB0002829 |
| Enterolactone glucuronide                 | C <sub>24</sub> H <sub>26</sub> O <sub>10</sub>                | 473.14532 | 473.146 | 1.437               | [M-H] <sup>-</sup>                  | HMDB0240377 |
| Codeine-6-glucuronide                     | C <sub>24</sub> H <sub>29</sub> NO <sub>9</sub>                | 474.17696 | 474.172 | 10.460              | [M-H] <sup>-</sup>                  | HMDB0060464 |
| 2-Methoxyestrone 3-glucuronide            | C <sub>25</sub> H <sub>32</sub> O <sub>9</sub>                 | 475.19736 | 475.195 | 4.966               | [M-H] <sup>-</sup>                  | HMDB0004482 |
| 2-Methoxy-estradiol-17b 3-glucuronide     | C <sub>25</sub> H <sub>34</sub> O <sub>9</sub>                 | 477.21301 | 477.209 | 8.403               | [M-H] <sup>-</sup>                  | HMDB0006765 |
| DG(16:0/24:0/0:0)*                        | C <sub>25</sub> H <sub>36</sub> O <sub>9</sub>                 | 479.22866 | 479.229 | 0.709               | [M-H] <sup>-</sup>                  | HMDB0010338 |
| Tetrahydrofolic acid <sup>‡</sup>         | C <sub>19</sub> H <sub>23</sub> N <sub>7</sub> O <sub>6</sub>  | 480.14038 | 480.139 | 2.874               | [M+Cl] <sup>-</sup>                 | HMDB0001846 |
| 6-Hydroxymelatonin <sup>†</sup>           | C <sub>25</sub> H <sub>38</sub> O <sub>9</sub>                 | 481.24431 | 481.245 | 1.434               | [M-H] <sup>-</sup>                  | HMDB0010351 |
| Aldosterone 18-glucuronide*               | C <sub>27</sub> H <sub>36</sub> O <sub>11</sub>                | 535.21849 | 535.218 | 0.916               | [M-H] <sup>-</sup>                  | HMDB0010345 |
| Cortolone-3-glucuronide* <sup>†</sup>     | C <sub>27</sub> H <sub>42</sub> O <sub>11</sub>                | 541.26544 | 541.266 | 1.035               | [M-H] <sup>-</sup>                  | HMDB0010320 |
| 577.24211                                 |                                                                | 577.240   | 3.655   | [M+Cl] <sup>-</sup> |                                     |             |
| Tetrahydroaldosterone-3-glucuronide       | C <sub>27</sub> H <sub>40</sub> O <sub>11</sub>                | 575.22646 | 575.225 | 2.538               | [M+Cl] <sup>-</sup>                 | HMDB0010357 |
| 3'-Sialyllactose* <sup>†‡</sup>           | C <sub>23</sub> H <sub>39</sub> NO <sub>19</sub>               | 632.20435 | 632.205 | 1.028               | [M-H] <sup>-</sup>                  | HMDB0000825 |
| 3-Sialyl-N-acetyllactosamine <sup>†</sup> | C <sub>25</sub> H <sub>42</sub> N <sub>2</sub> O <sub>19</sub> | 673.23090 | 673.232 | 1.634               | [M-H] <sup>-</sup>                  | HMDB0006581 |

\* Differential metabolites between GU and HC, † Differential metabolites between BC and PC, ‡ Metabolites validated by LC-MS/MS.

**Table S2.** Some of the metabolites in positive ion mode and negative ion mode using LC-MS/MS.

| Name                          | Formula                                                         | Theoretical<br><i>m/z</i> | Experimental<br><i>m/z</i> | Delta (ppm) | Adduct              |
|-------------------------------|-----------------------------------------------------------------|---------------------------|----------------------------|-------------|---------------------|
| Tryptophol                    | C <sub>10</sub> H <sub>11</sub> NO                              | 160.076                   | 160.076                    | 0.000       | [M-H] <sup>-</sup>  |
| N-Benzyloxycarbonylglycine    | C <sub>10</sub> H <sub>11</sub> NO <sub>4</sub>                 | 210.07600                 | 210.080                    | 19.041      | [M+H] <sup>+</sup>  |
|                               |                                                                 | 208.06911                 | 208.062                    | 34.171      | [M-H] <sup>-</sup>  |
| Porphobilinogen               | C <sub>10</sub> H <sub>14</sub> N <sub>2</sub> O <sub>4</sub>   | 227.10260                 | 227.101                    | 7.045       | [M+H] <sup>+</sup>  |
|                               |                                                                 | 227.10260                 | 227.102                    | 2.642       | [M+Na] <sup>+</sup> |
| Ribothymidine                 | C <sub>10</sub> H <sub>14</sub> N <sub>2</sub> O <sub>6</sub>   | 259.09180                 | 259.090                    | 6.947       | [M+H] <sup>+</sup>  |
|                               |                                                                 | 257.07819                 | 257.078                    | 0.739       | [M-H] <sup>-</sup>  |
| 3-Methyluridine               | C <sub>10</sub> H <sub>14</sub> N <sub>2</sub> O <sub>6</sub>   | 259.08289                 | 259.080                    | 11.155      | [M+H] <sup>+</sup>  |
|                               |                                                                 | 257.07541                 | 257.076                    | 2.295       | [M-H] <sup>-</sup>  |
| Prolylhydroxyproline          | C <sub>10</sub> H <sub>16</sub> N <sub>2</sub> O <sub>4</sub>   | 229.11830                 | 229.117                    | 5.674       | [M+H] <sup>+</sup>  |
|                               |                                                                 | 227.10373                 | 227.104                    | 1.189       | [M-H] <sup>-</sup>  |
|                               |                                                                 | 407.17001                 | 407.169                    | 2.481       | [2M-H] <sup>-</sup> |
| L-Tryptophan                  | C <sub>11</sub> H <sub>12</sub> N <sub>2</sub> O <sub>2</sub>   | 188.07001                 | 188.070                    | 0.053       | [M+H] <sup>+</sup>  |
|                               |                                                                 | 203.08260                 | 203.083                    | 1.970       | [M-H] <sup>-</sup>  |
| N-Acetylcytidine              | C <sub>11</sub> H <sub>15</sub> N <sub>3</sub> O <sub>6</sub>   | 286.10309                 | 286.105                    | 6.676       | [M+H] <sup>+</sup>  |
|                               |                                                                 | 284.08890                 | 284.087                    | 6.688       | [M-H] <sup>-</sup>  |
| 5'-Methylthioadenosine        | C <sub>11</sub> H <sub>15</sub> N <sub>5</sub> O <sub>3</sub> S | 298.09683                 | 298.095                    | 6.139       | [M+H] <sup>+</sup>  |
|                               |                                                                 | 296.08228                 | 296.085                    | 9.187       | [M-H] <sup>-</sup>  |
| N-Acetylaspartylglutamic acid | C <sub>11</sub> H <sub>16</sub> N <sub>2</sub> O <sub>8</sub>   | 303.08368                 | 303.089                    | 17.553      | [M-H] <sup>-</sup>  |

|                                    |                                                                                |           |         |        |                     |
|------------------------------------|--------------------------------------------------------------------------------|-----------|---------|--------|---------------------|
| N-Acetylneuraminic acid            | C <sub>11</sub> H <sub>19</sub> NO <sub>9</sub>                                | 308.09818 | 308.094 | 13.567 | [M-H] <sup>-</sup>  |
| Nilutamide                         | C <sub>12</sub> H <sub>10</sub> F <sub>3</sub> N <sub>3</sub> O <sub>4</sub>   | 316.05511 | 316.051 | 13.004 | [M-H] <sup>-</sup>  |
| methyl 3-(1H-indol-3-yl)propanoate | C <sub>12</sub> H <sub>13</sub> NO <sub>2</sub>                                | 204.10190 | 204.101 | 4.410  | [M+H] <sup>+</sup>  |
| N2,N2-Dimethylguanosine            | C <sub>12</sub> H <sub>17</sub> N <sub>5</sub> O <sub>5</sub>                  | 312.12970 | 312.131 | 4.165  | [M+H] <sup>+</sup>  |
|                                    |                                                                                | 310.11591 | 310.115 | 2.934  | [M-H] <sup>-</sup>  |
| Trehalose                          | C <sub>12</sub> H <sub>22</sub> O <sub>11</sub>                                | 365.10541 | 365.110 | 12.572 | [M+Na] <sup>+</sup> |
|                                    |                                                                                | 377.13000 | 377.129 | 2.652  | [M+Cl] <sup>-</sup> |
| N-Acetyltryptophan                 | C <sub>13</sub> H <sub>14</sub> N <sub>2</sub> O <sub>3</sub>                  | 247.10809 | 247.108 | 0.364  | [M+H] <sup>+</sup>  |
|                                    |                                                                                | 245.09309 | 245.093 | 0.367  | [M-H] <sup>-</sup>  |
| Melatonin                          | C <sub>13</sub> H <sub>16</sub> N <sub>2</sub> O <sub>2</sub>                  | 233.00000 | 232.999 | 4.292  | [M+H] <sup>+</sup>  |
|                                    |                                                                                | 231.11430 | 231.123 | 37.644 | [M-H] <sup>-</sup>  |
| Phenylacetylglutamine              | C <sub>13</sub> H <sub>16</sub> N <sub>2</sub> O <sub>4</sub>                  | 265.11951 | 265.118 | 5.696  | [M+H] <sup>+</sup>  |
|                                    |                                                                                | 263.10251 | 263.104 | 5.663  | [M-H] <sup>-</sup>  |
| Aspartylphenylalanine              | C <sub>13</sub> H <sub>16</sub> N <sub>2</sub> O <sub>5</sub>                  | 281.10001 | 281.100 | 0.036  | [M+H] <sup>+</sup>  |
| Ibuprofen                          | C <sub>13</sub> H <sub>18</sub> O <sub>2</sub>                                 | 207.13795 | 207.137 | 4.586  | [M+H] <sup>+</sup>  |
| Gliclazide                         | C <sub>15</sub> H <sub>21</sub> N <sub>3</sub> O <sub>3</sub> S                | 324.13760 | 324.142 | 13.574 | [M+H] <sup>+</sup>  |
|                                    |                                                                                | 322.12311 | 322.129 | 18.285 | [M-H] <sup>-</sup>  |
| Riboflavin                         | C <sub>17</sub> H <sub>20</sub> N <sub>4</sub> O <sub>6</sub>                  | 377.14557 | 377.146 | 1.140  | [M+H] <sup>+</sup>  |
|                                    |                                                                                | 375.13049 | 375.128 | 6.638  | [M-H] <sup>-</sup>  |
| Bicalutamide                       | C <sub>18</sub> H <sub>14</sub> F <sub>4</sub> N <sub>2</sub> O <sub>4</sub> S | 431.06830 | 431.067 | 3.016  | [M+H] <sup>+</sup>  |
|                                    |                                                                                | 429.05380 | 429.051 | 6.526  | [M-H] <sup>-</sup>  |
| Enterodiol                         | C <sub>18</sub> H <sub>22</sub> O <sub>4</sub>                                 | 285.14871 | 285.147 | 5.997  | [M+H] <sup>+</sup>  |

|                           |                                                               |           |         |        |                     |
|---------------------------|---------------------------------------------------------------|-----------|---------|--------|---------------------|
| Casticin                  | C <sub>19</sub> H <sub>18</sub> O <sub>8</sub>                | 375.10718 | 375.109 | 4.852  | [M+H] <sup>+</sup>  |
| Tetrahydrofolic acid      | C <sub>19</sub> H <sub>23</sub> N <sub>7</sub> O <sub>6</sub> | 444.16370 | 444.163 | 1.576  | [M-H] <sup>-</sup>  |
| Alfuzosin                 | C <sub>19</sub> H <sub>27</sub> N <sub>5</sub> O <sub>4</sub> | 388.19904 | 388.209 | 25.657 | [M-H] <sup>-</sup>  |
| Androsterone sulfate      | C <sub>19</sub> H <sub>30</sub> O <sub>5</sub> S              | 369.17410 | 369.173 | 2.980  | [M-H] <sup>-</sup>  |
| 3'-Sialyllactose          | C <sub>23</sub> H <sub>39</sub> NO <sub>19</sub>              | 632.20441 | 632.206 | 2.515  | [M-H] <sup>-</sup>  |
| Glycodeoxycholic acid     | C <sub>26</sub> H <sub>43</sub> NO <sub>5</sub>               | 450.10001 | 450.104 | 8.865  | [M+H] <sup>+</sup>  |
| Uric acid                 | C <sub>5</sub> H <sub>4</sub> N <sub>4</sub> O <sub>3</sub>   | 167.02100 | 167.021 | 0.000  | [M-H] <sup>-</sup>  |
| Glucuronic acid           | C <sub>6</sub> H <sub>10</sub> O <sub>7</sub>                 | 169.03561 | 169.034 | 9.525  | [M+H] <sup>+</sup>  |
| Glucose                   | C <sub>6</sub> H <sub>12</sub> O <sub>6</sub>                 | 193.03537 | 193.036 | 3.264  | [M-H] <sup>-</sup>  |
| Inositol                  | C <sub>6</sub> H <sub>12</sub> O <sub>6</sub>                 | 181.07066 | 181.070 | 3.645  | [M+Na] <sup>+</sup> |
| Gluconic acid             | C <sub>6</sub> H <sub>12</sub> O <sub>7</sub>                 | 179.05540 | 179.056 | 3.351  | [M-H] <sup>-</sup>  |
| 1-Methyluric acid         | C <sub>6</sub> H <sub>6</sub> N <sub>4</sub> O <sub>3</sub>   | 203.05260 | 203.049 | 17.729 | [M+Na] <sup>+</sup> |
| Ascorbic acid             | C <sub>6</sub> H <sub>8</sub> O <sub>6</sub>                  | 195.05099 | 195.051 | 0.051  | [M-H] <sup>-</sup>  |
| Citric acid               | C <sub>6</sub> H <sub>8</sub> O <sub>7</sub>                  | 183.05127 | 183.049 | 12.401 | [M+H] <sup>+</sup>  |
| Quinolinic acid           | C <sub>7</sub> H <sub>5</sub> NO <sub>4</sub>                 | 181.03670 | 181.036 | 3.867  | [M-H] <sup>-</sup>  |
| 3-Hydroxyanthranilic acid | C <sub>7</sub> H <sub>7</sub> NO <sub>3</sub>                 | 175.02480 | 175.023 | 10.284 | [M-H] <sup>-</sup>  |
| p-Tolyl Sulfate           | C <sub>7</sub> H <sub>8</sub> O <sub>4</sub> S                | 191.01900 | 191.019 | 0.000  | [M-H] <sup>-</sup>  |
| 3-Indoxyl sulfate         | C <sub>8</sub> H <sub>7</sub> NO <sub>4</sub> S               | 193.03429 | 193.034 | 1.502  | [M+H] <sup>+</sup>  |
|                           |                                                               | 166.01486 | 166.016 | 6.867  | [M-H] <sup>-</sup>  |
|                           |                                                               | 154.04980 | 154.049 | 5.193  | [M+H] <sup>+</sup>  |
|                           |                                                               | 187.00710 | 187.007 | 0.535  | [M-H] <sup>-</sup>  |
|                           |                                                               | 212.00230 | 212.003 | 3.302  | [M-H] <sup>-</sup>  |

|                               |                                                              |           |         |       |                    |
|-------------------------------|--------------------------------------------------------------|-----------|---------|-------|--------------------|
| 4-Hydroxyphenyllactic acid    | C <sub>9</sub> H <sub>10</sub> O <sub>4</sub>                | 181.04980 | 181.050 | 1.105 | [M-H] <sup>-</sup> |
| DL-p-Hydroxyphenyllactic acid |                                                              | 181.05011 | 181.049 | 6.131 | [M-H] <sup>-</sup> |
| Pseudouridine                 | C <sub>9</sub> H <sub>12</sub> N <sub>2</sub> O <sub>6</sub> | 243.06210 | 243.062 | 0.411 | [M-H] <sup>-</sup> |
| Uridine                       |                                                              | 245.07680 | 245.076 | 3.264 | [M+H] <sup>+</sup> |
| Hippuric acid                 | C <sub>9</sub> H <sub>9</sub> NO <sub>3</sub>                | 180.06551 | 180.065 | 2.832 | [M+H] <sup>+</sup> |
|                               |                                                              | 178.05099 | 178.051 | 0.056 | [M-H] <sup>-</sup> |
| 4-Hydroxyhippuric acid        | C <sub>9</sub> H <sub>9</sub> NO <sub>4</sub>                | 196.05920 | 196.060 | 4.080 | [M+H] <sup>+</sup> |
|                               |                                                              | 194.04520 | 194.046 | 4.123 | [M-H] <sup>-</sup> |
| Salicyluric acid              |                                                              | 194.04590 | 194.046 | 0.515 | [M-H] <sup>-</sup> |

---

**Table S3.** Age and gender distribution.

|                       | BC (n = 38)<br>GU (n = 77) | PC (n = 39) | HC (n = 40) | p value |
|-----------------------|----------------------------|-------------|-------------|---------|
| <b>Cohort 1</b>       |                            |             |             |         |
| Number of individuals |                            | 56          | 33          |         |
| Age, mean ± SE        |                            | 66.1 ± 0.9  | 62.9 ± 1.5  | 0.054   |
| Age range             |                            | 55-77       | 53-86       | -       |
| Gender (f/m)          |                            | 3/53        | 5/28        | 0.239   |
| <b>Cohort 2</b>       |                            |             |             |         |
| Number of individuals | 38                         | 39          | -           |         |
| Age, mean ± SE        | 65.5 ± 1.9                 | 70.1 ± 1.4  | -           | 0.052   |
| Age range             | 41-81                      | 56-83       | -           | -       |
| Gender (f/m)          | 4/34                       | 0/39        | -           | 0.117   |
| <b>Cohort 3</b>       |                            |             |             |         |
| Number of individuals | 38                         | -           | 40          |         |
| Age, mean ± SE        | 65.5 ± 1.9                 | -           | 61.0 ± 1.4  | 0.057   |
| Age range             | 41-81                      | -           | 50-86       | -       |
| Gender (f/m)          | 4/34                       | -           | 5/35        | 1.000   |
| <b>Cohort 4</b>       |                            |             |             |         |
| Number of individuals | -                          | 32          | 31          |         |
| Age, mean ± SE        | -                          | 67.3 ± 1.2  | 63.5 ± 1.5  | 0.054   |
| Age range             | -                          | 56-82       | 54-86       | -       |
| Gender (f/m)          | -                          | 0/32        | 0/31        | 1.000   |
| <b>Cohort 5</b>       |                            |             |             |         |
| Number of individuals | 27                         | -           | 40          |         |
| Age, mean ± SE        | 63.9 ± 2.2                 | -           | 61.0 ± 1.4  | 0.057   |
| Age range             | 41-81                      | -           | 50-86       | -       |
| Gender (f/m)          | 3/24                       | -           | 5/35        | 1.000   |

The two-tailed test was used to calculate the statistical significance in age distribution between the groups in each cohort. A chi-square ( $\chi^2$ ) test was applied to calculate the statistical significance in gender composition. BC: bladder cancer group, PC: prostate cancer group, HC: healthy control group. Cohort 1: GU (BC+PC) vs HC, Cohort 2: BC vs PC, Cohort 3: BC vs HC, Cohort 4: PC vs HC and Cohort 5: initial-diagnosed BC vs HC.

**Table S4.** Detailed information of the patients.

| No. | Gender | Age | Group | Therapy | Cohort |   |   |   |
|-----|--------|-----|-------|---------|--------|---|---|---|
|     |        |     |       |         | 1      | 2 | 3 | 4 |
| 1   | male   | 50  | HC    |         |        |   | √ |   |
| 2   | male   | 51  | HC    |         |        |   | √ |   |
| 3   | male   | 51  | HC    |         |        |   | √ |   |
| 4   | male   | 52  | HC    |         |        |   | √ |   |
| 5   | male   | 53  | HC    |         |        |   | √ |   |
| 6   | male   | 53  | HC    |         |        |   | √ |   |
| 7   | male   | 53  | HC    |         |        |   | √ |   |
| 8   | male   | 53  | HC    |         | √      |   | √ |   |
| 9   | male   | 54  | HC    |         | √      |   | √ |   |
| 10  | male   | 54  | HC    |         | √      |   | √ | √ |
| 11  | male   | 55  | HC    |         | √      |   | √ | √ |
| 12  | male   | 55  | HC    |         | √      |   | √ | √ |
| 13  | male   | 56  | HC    |         | √      |   | √ | √ |
| 14  | male   | 56  | HC    |         | √      |   | √ | √ |
| 15  | male   | 56  | HC    |         | √      |   | √ | √ |
| 16  | male   | 56  | HC    |         | √      |   | √ | √ |
| 17  | male   | 57  | HC    |         | √      |   | √ | √ |
| 18  | male   | 57  | HC    |         | √      |   | √ | √ |
| 19  | female | 58  | HC    |         | √      |   | √ | √ |
| 20  | male   | 58  | HC    |         | √      |   | √ | √ |
| 21  | male   | 58  | HC    |         | √      |   | √ | √ |
| 22  | male   | 58  | HC    |         | √      |   | √ | √ |
| 23  | female | 59  | HC    |         | √      |   | √ | √ |
| 24  | male   | 60  | HC    |         | √      |   | √ | √ |
| 25  | male   | 60  | HC    |         | √      |   | √ | √ |
| 26  | male   | 61  | HC    |         | √      |   | √ | √ |
| 27  | female | 63  | HC    |         | √      |   | √ | √ |
| 28  | male   | 63  | HC    |         | √      |   | √ | √ |
| 29  | male   | 63  | HC    |         | √      |   | √ | √ |
| 30  | male   | 65  | HC    |         | √      |   | √ | √ |
| 31  | male   | 66  | HC    |         | √      |   | √ | √ |
| 32  | female | 71  | HC    |         | √      |   | √ | √ |
| 33  | female | 71  | HC    |         | √      |   | √ | √ |
| 34  | male   | 72  | HC    |         | √      |   | √ | √ |
| 35  | male   | 73  | HC    |         | √      |   | √ | √ |
| 36  | male   | 73  | HC    |         | √      |   | √ | √ |
| 37  | male   | 75  | HC    |         | √      |   | √ | √ |
| 38  | male   | 76  | HC    |         | √      |   | √ | √ |
| 39  | male   | 79  | HC    |         | √      |   | √ | √ |
| 40  | male   | 86  | HC    |         | √      |   | √ | √ |

|    |        |    |    |                                |   |   |
|----|--------|----|----|--------------------------------|---|---|
| 41 | male   | 41 | BC |                                | √ | √ |
| 42 | male   | 43 | BC |                                | √ | √ |
| 43 | male   | 45 | BC |                                | √ | √ |
| 44 | male   | 47 | BC | postoperative,<br>chemotherapy | √ | √ |
| 45 | male   | 47 | BC |                                | √ | √ |
| 46 | male   | 55 | BC |                                | √ | √ |
| 47 | male   | 55 | BC |                                | √ | √ |
| 48 | male   | 56 | BC | postoperative                  | √ | √ |
| 49 | male   | 57 | BC |                                | √ | √ |
| 50 | male   | 57 | BC |                                | √ | √ |
| 51 | male   | 57 | BC |                                | √ | √ |
| 52 | male   | 57 | BC |                                | √ | √ |
| 53 | male   | 61 | BC |                                | √ | √ |
| 54 | male   | 62 | BC | postoperative                  | √ | √ |
| 55 | male   | 63 | BC | postoperative,<br>chemotherapy | √ | √ |
| 56 | female | 64 | BC |                                | √ | √ |
| 57 | female | 65 | BC |                                | √ | √ |
| 58 | male   | 66 | BC |                                | √ | √ |
| 59 | male   | 67 | BC |                                | √ | √ |
| 60 | male   | 69 | BC |                                | √ | √ |
| 61 | male   | 69 | BC |                                | √ | √ |
| 62 | male   | 70 | BC |                                | √ | √ |
| 63 | male   | 70 | BC | chemotherapy                   | √ | √ |
| 64 | male   | 70 | BC | postoperative                  | √ | √ |
| 65 | male   | 71 | BC |                                | √ | √ |
| 66 | male   | 71 | BC |                                | √ | √ |
| 67 | male   | 74 | BC |                                | √ | √ |
| 68 | male   | 75 | BC |                                | √ | √ |
| 69 | male   | 75 | BC | chemotherapy                   | √ | √ |
| 70 | female | 76 | BC |                                | √ | √ |
| 71 | male   | 76 | BC |                                | √ | √ |
| 72 | male   | 76 | BC |                                | √ | √ |
| 73 | male   | 80 | BC | postoperative,<br>chemotherapy | √ | √ |
| 74 | male   | 80 | BC | postoperative                  | √ | √ |
| 75 | male   | 80 | BC |                                | √ | √ |
| 76 | female | 80 | BC | postoperative,<br>chemotherapy | √ | √ |
| 77 | male   | 80 | BC | postoperative,<br>chemotherapy | √ | √ |
| 78 | male   | 81 | BC |                                | √ | √ |



|     |      |    |    |              |   |   |   |
|-----|------|----|----|--------------|---|---|---|
| 79  | male | 56 | PC |              | √ | √ | √ |
| 80  | male | 59 | PC |              | √ | √ | √ |
| 81  | male | 59 | PC |              | √ | √ | √ |
| 82  | male | 60 | PC |              | √ | √ | √ |
| 83  | male | 60 | PC | radiotherapy | √ | √ | √ |
| 84  | male | 60 | PC | radiotherapy | √ | √ | √ |
| 85  | male | 60 | PC |              | √ | √ | √ |
| 86  | male | 60 | PC |              | √ | √ | √ |
| 87  | male | 60 | PC |              | √ | √ | √ |
| 88  | male | 65 | PC |              | √ | √ | √ |
| 89  | male | 65 | PC |              | √ | √ | √ |
| 90  | male | 65 | PC |              | √ | √ | √ |
| 91  | male | 65 | PC |              | √ | √ | √ |
| 92  | male | 65 | PC | radiotherapy | √ | √ | √ |
| 93  | male | 65 | PC |              | √ | √ | √ |
| 94  | male | 66 | PC |              | √ | √ | √ |
| 95  | male | 66 | PC |              | √ | √ | √ |
| 96  | male | 66 | PC |              | √ | √ | √ |
| 97  | male | 69 | PC |              | √ | √ | √ |
| 98  | male | 69 | PC |              | √ | √ | √ |
| 99  | male | 69 | PC |              | √ | √ | √ |
| 100 | male | 69 | PC |              | √ | √ | √ |
| 101 | male | 72 | PC |              | √ | √ | √ |
| 102 | male | 72 | PC |              | √ | √ | √ |
| 103 | male | 74 | PC |              | √ | √ | √ |
| 104 | male | 74 | PC |              | √ | √ | √ |
| 105 | male | 74 | PC |              | √ | √ | √ |
| 106 | male | 74 | PC |              | √ | √ | √ |
| 107 | male | 77 | PC |              | √ | √ | √ |
| 108 | male | 77 | PC |              |   | √ | √ |
| 109 | male | 81 | PC |              |   | √ | √ |
| 110 | male | 82 | PC |              |   | √ | √ |
| 111 | male | 82 | PC |              |   | √ |   |
| 112 | male | 82 | PC |              |   | √ |   |
| 113 | male | 83 | PC |              |   | √ |   |
| 114 | male | 83 | PC |              |   | √ |   |
| 115 | male | 83 | PC |              |   | √ |   |
| 116 | male | 83 | PC |              |   | √ |   |
| 117 | male | 83 | PC |              |   | √ |   |

BC: bladder cancer patients, PC: prostate cancer patients, HC: healthy control volunteers, √: used in the cohort.

**Table S5.** Human biospecimens characteristics.

| <b>characteristics</b>         |                                                  |
|--------------------------------|--------------------------------------------------|
| Biospecimen type               | Urine                                            |
| Clinical diagnosis of patients | Bladder cancer, Prostate cancer, Healthy control |
| Collection mechanism           | Fasting morning urine                            |
| Constitution of preservative   | None                                             |
| Type of long-term preservation | Freezing                                         |
| Storage temperature            | -80°C                                            |
| Storage duration               | 0 to 7 months                                    |

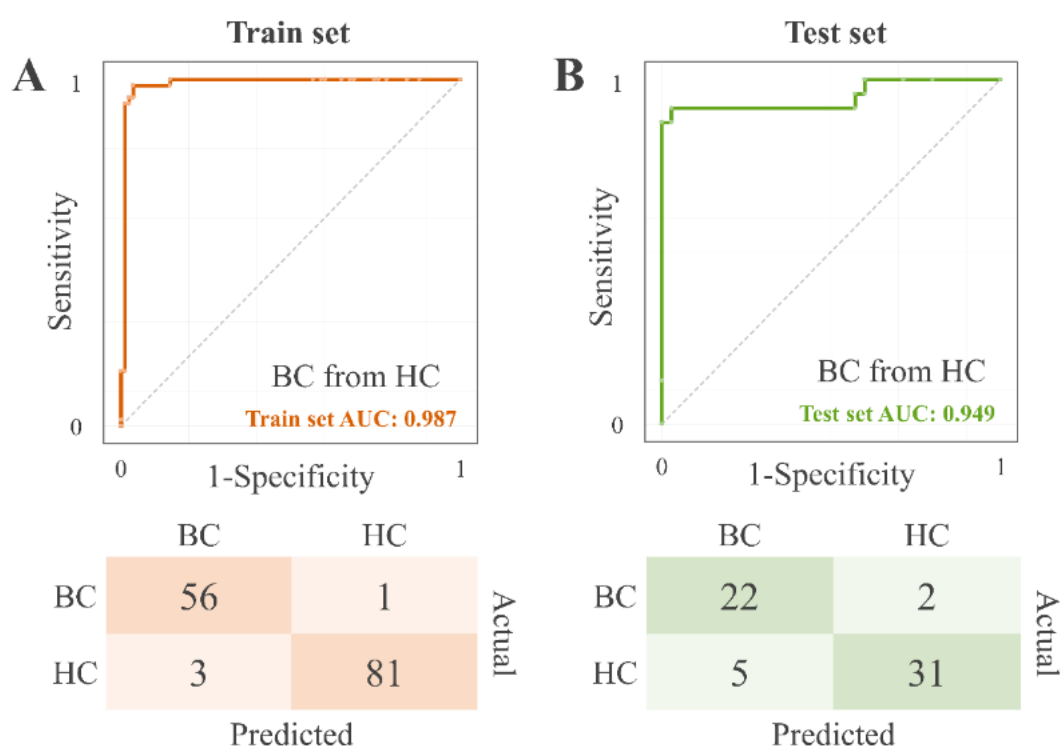

**Fig. S8** ROC curves of diagnostic performances and confusion matrices based on (A) train set and (B) test set of cohort 5 using Neural Network model.

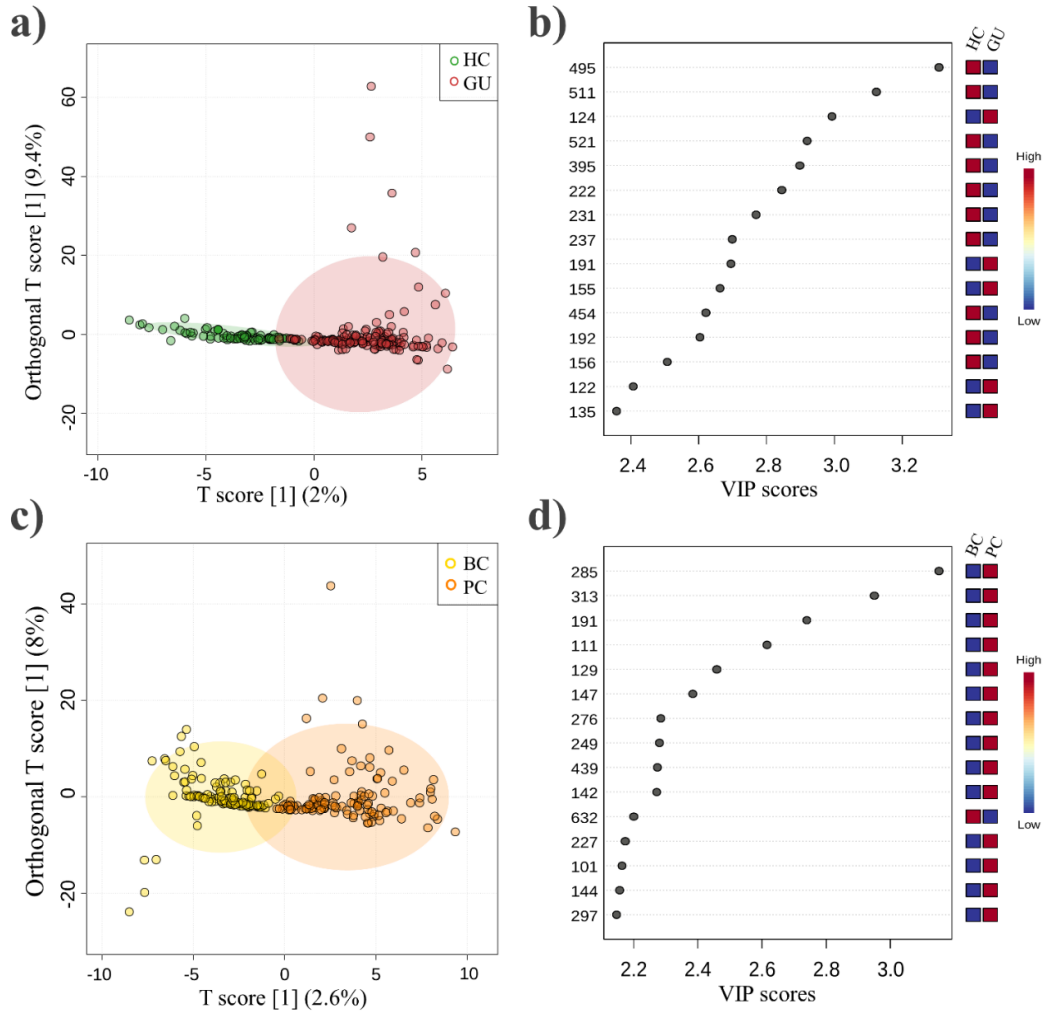

**Fig. S9** Orthogonal partial least squares discrimination analysis (OPLS-DA). OPLS-DA score plots of **a)** cohort 1 and **c)** cohort 2. Variable importance in the projection (VIP) score plot of **b)** cohort 1 and **d)** cohort 2.

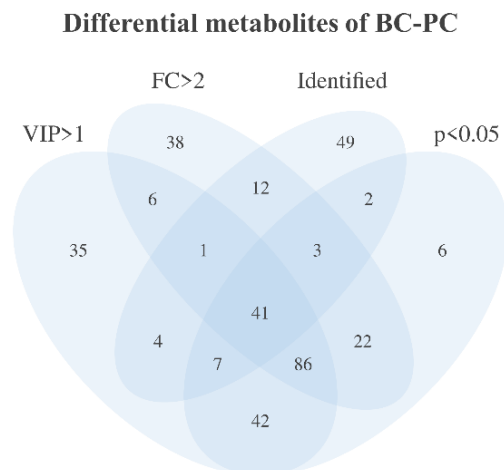

**Fig. S10** Venn diagram of differential metabolites between BC and PC. VIP: variable importance of projection values. FC: fold change values (the metabolite content ratios of BC to PC in cohort 2). Identified: metabolites with annotation. p: p values with FDR-corrected using the two-tailed test.

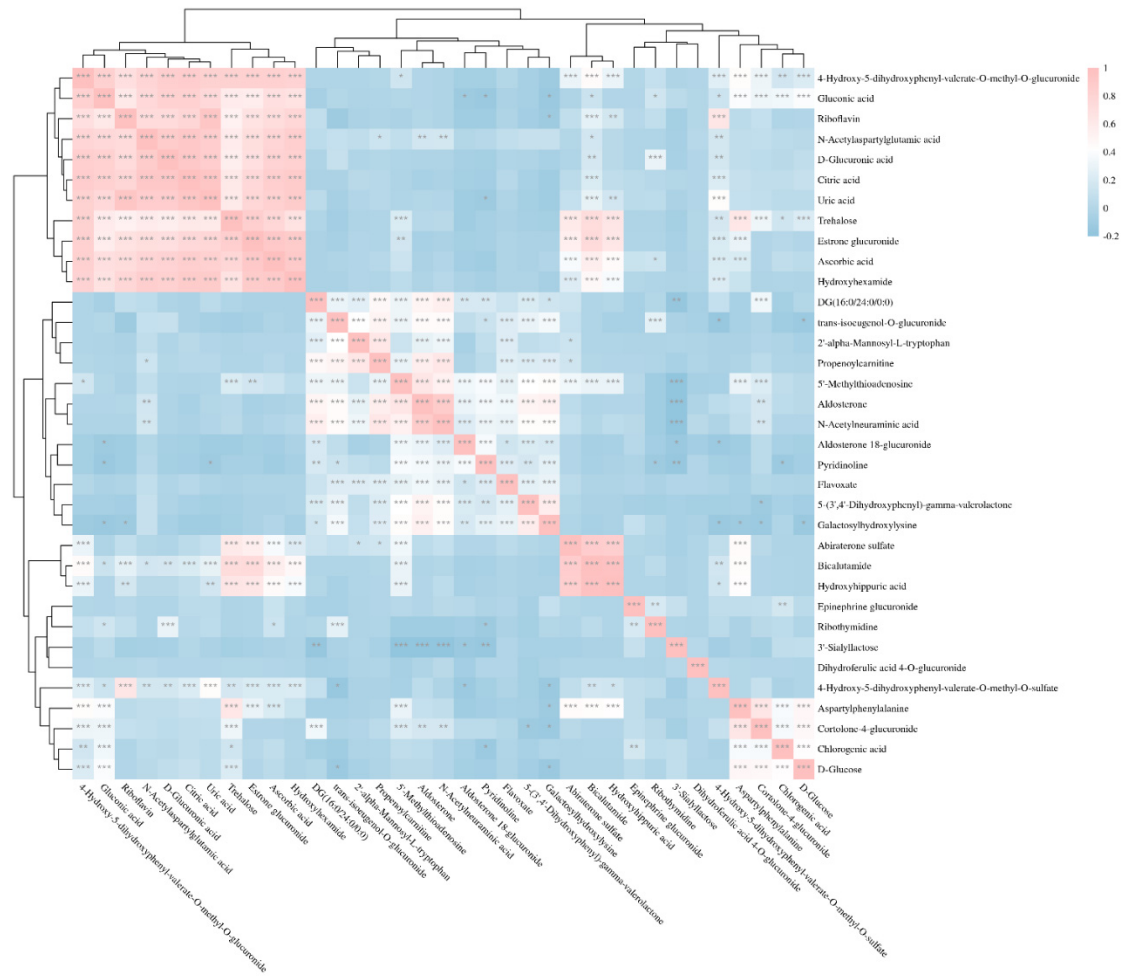

**Fig. S11** The Pearson correlation heatmap of 35 differential metabolites between GU and HC in cohort 1. Pink indicates a positive correlation, while blue indicates a negative correlation. \*: <math><0.05</math>, \*\*: <math><0.01</math>, \*\*\*: <math><0.001</math>. GU: genitourinary cancers group including bladder cancer (BC) and prostate cancer (PC). HC: healthy control group.

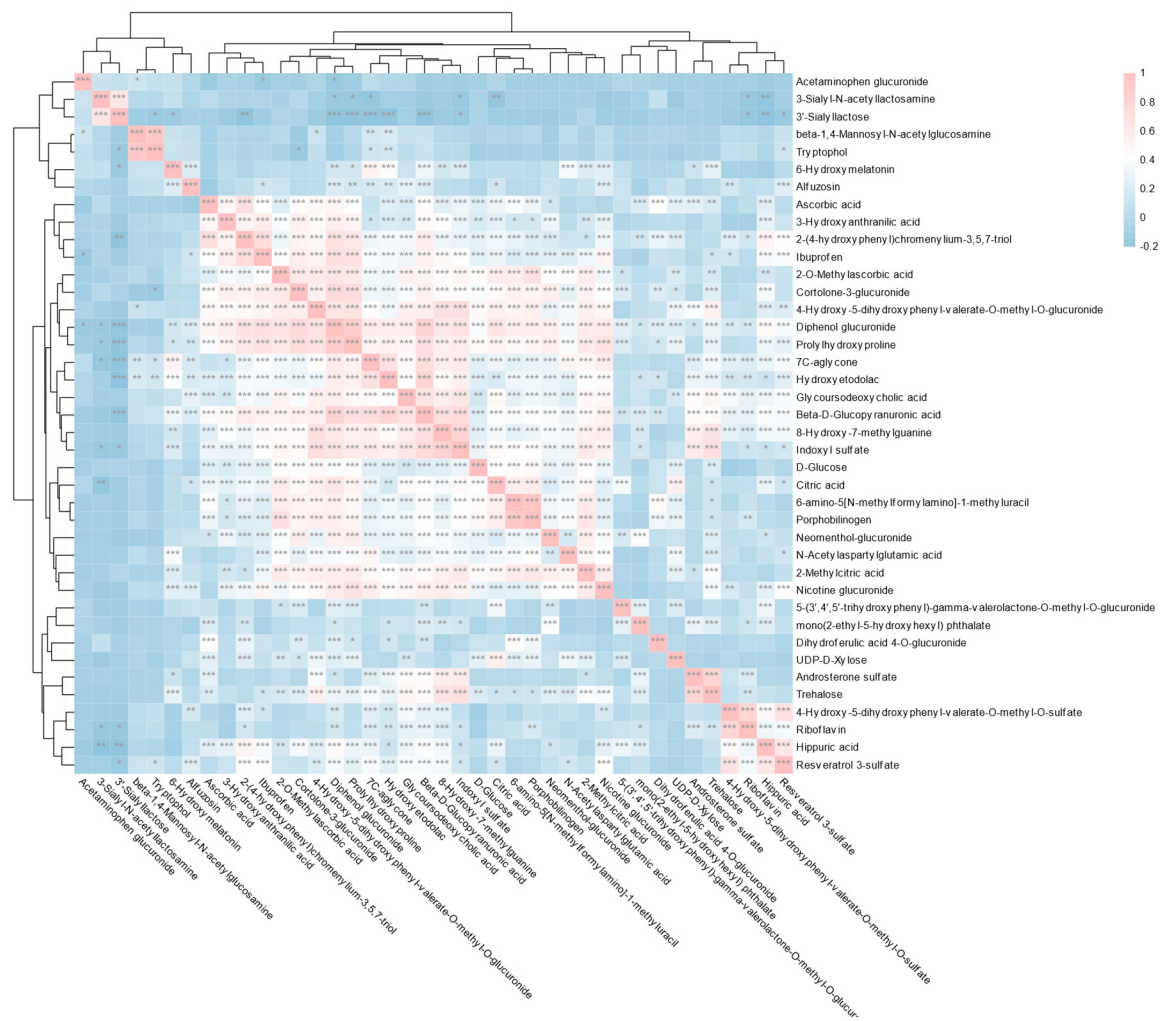

**Fig. S12** The Pearson correlation heatmap of 41 differential metabolites between BC and PC in cohort 2. Pink indicates a positive correlation, while blue indicates a negative correlation. \*: <math><0.05</math>, \*\*: <math><0.01</math>, \*\*\*: <math><0.001</math>. BC: bladder cancer group, PC: prostate cancer group.

# Correlation Network

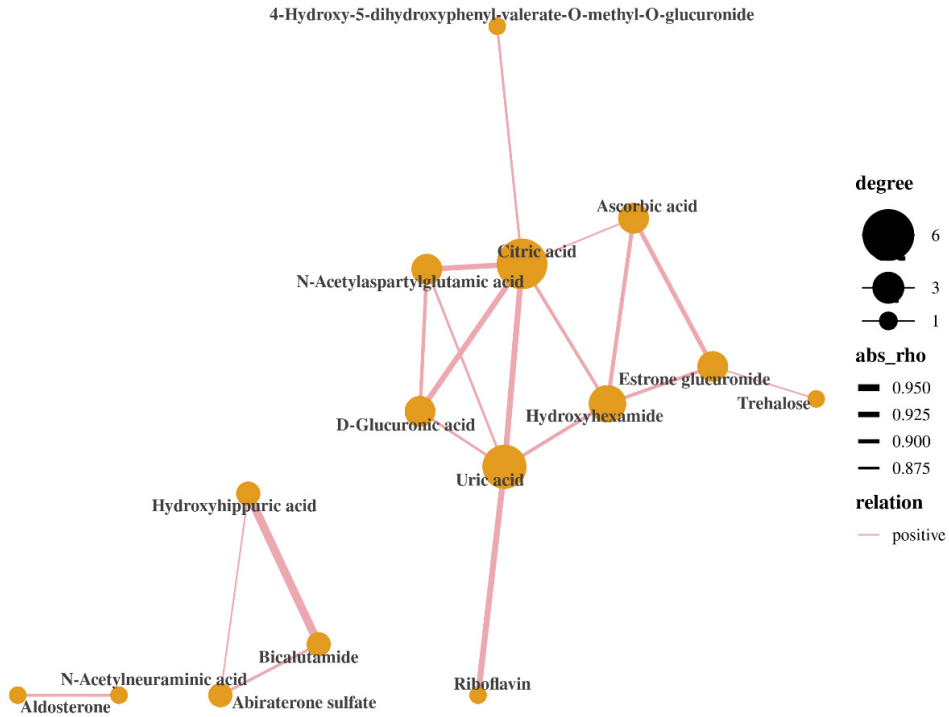

**Fig. S13** Correlation network (Pearson correlation > 0.85) of differential metabolites between GU and HC.

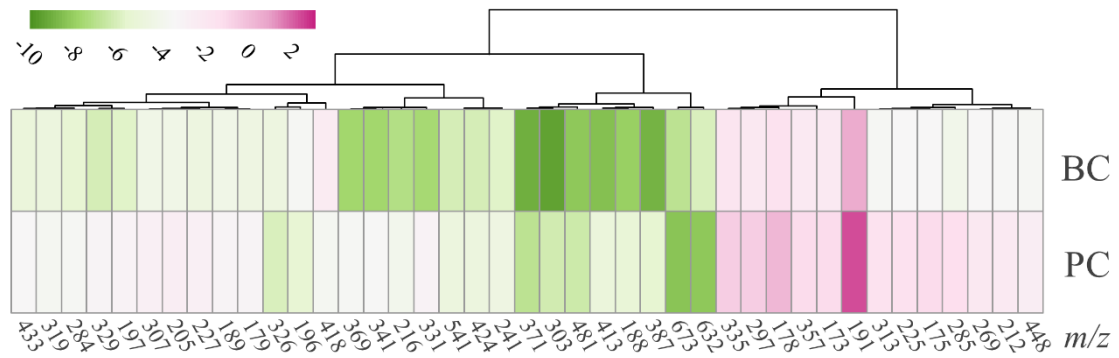

**Fig. S14** The heatmap constructed from the average normalized intensity values of 41 differential metabolites between BC and PC.

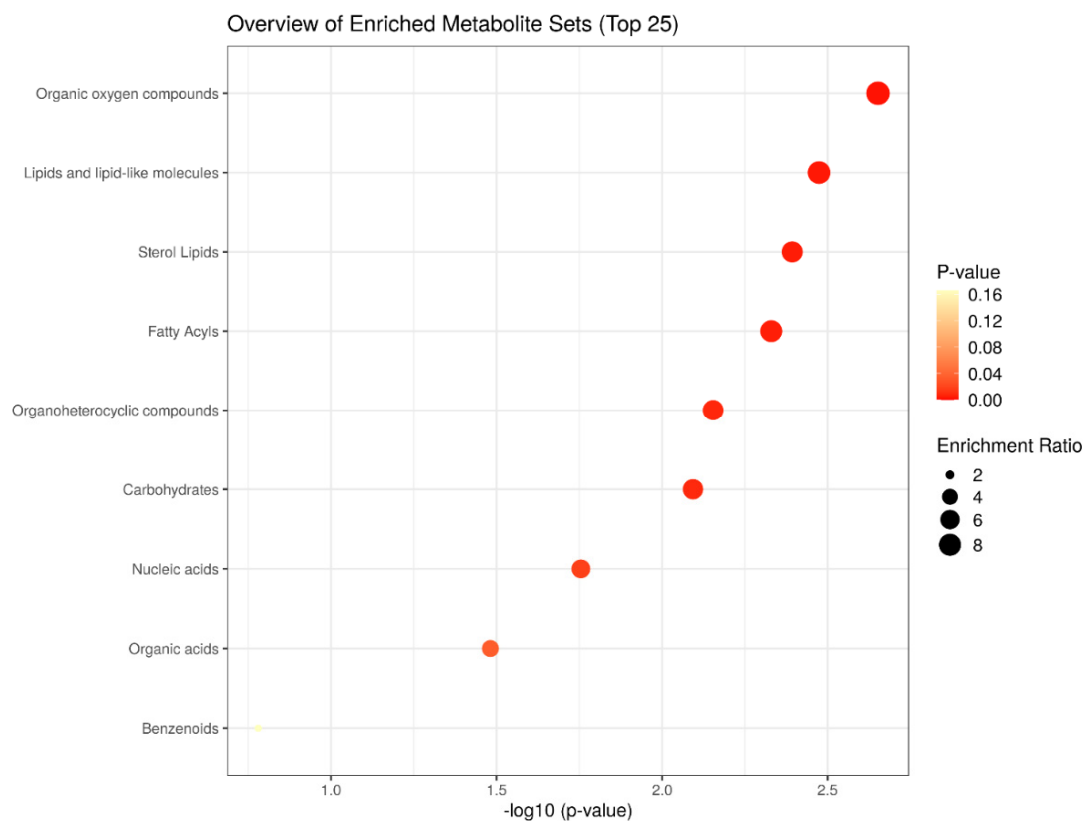

**Fig. S15** Quantitative metabolite sets enrichment analysis (qMSEA) based on chemical structures of differential metabolites between GU and HC.

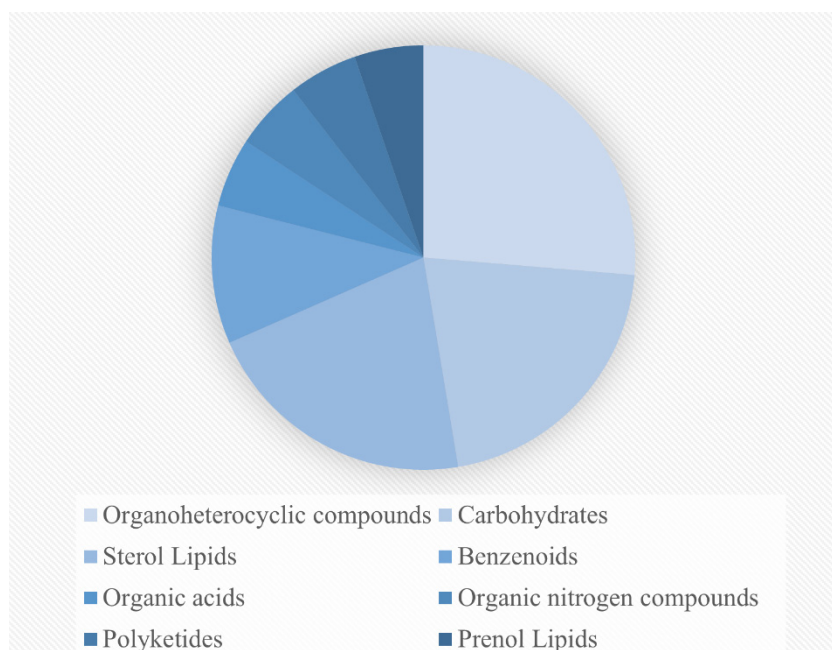

**Fig. S16** Distribution pie chart of major metabolite sets of differential metabolites between BC and PC.

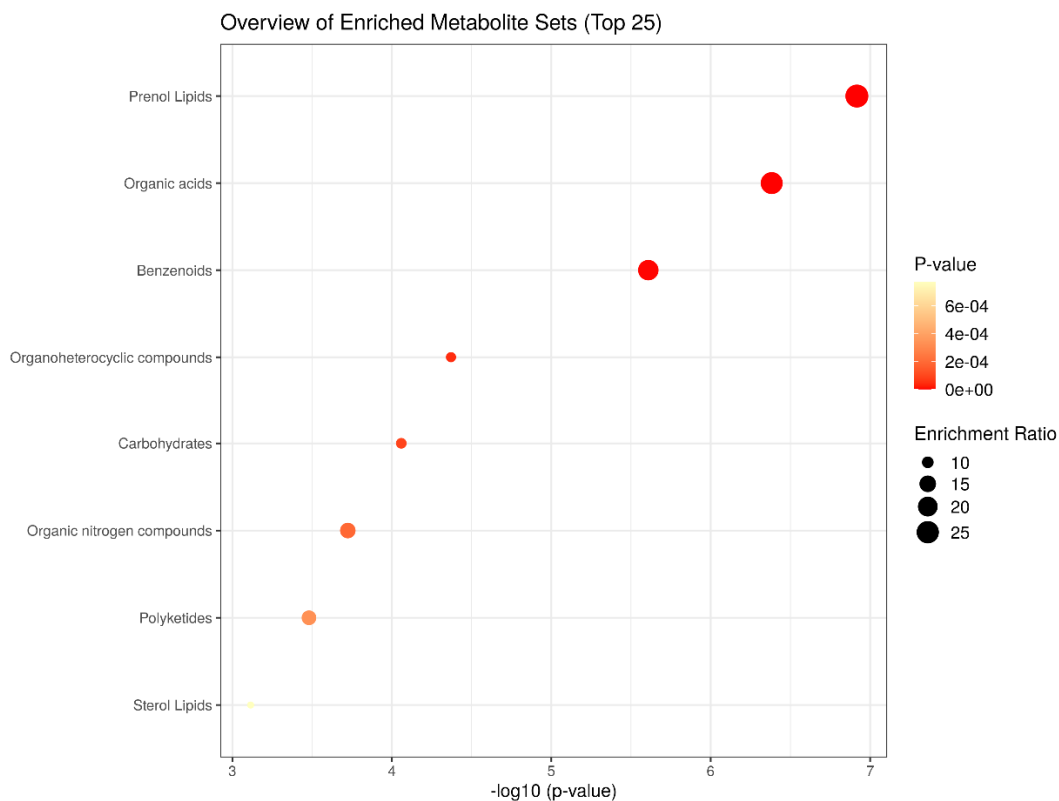

**Fig. S17** Quantitative metabolite sets enrichment analysis (qMSEA) based on chemical structures of differential metabolites between BC and PC.

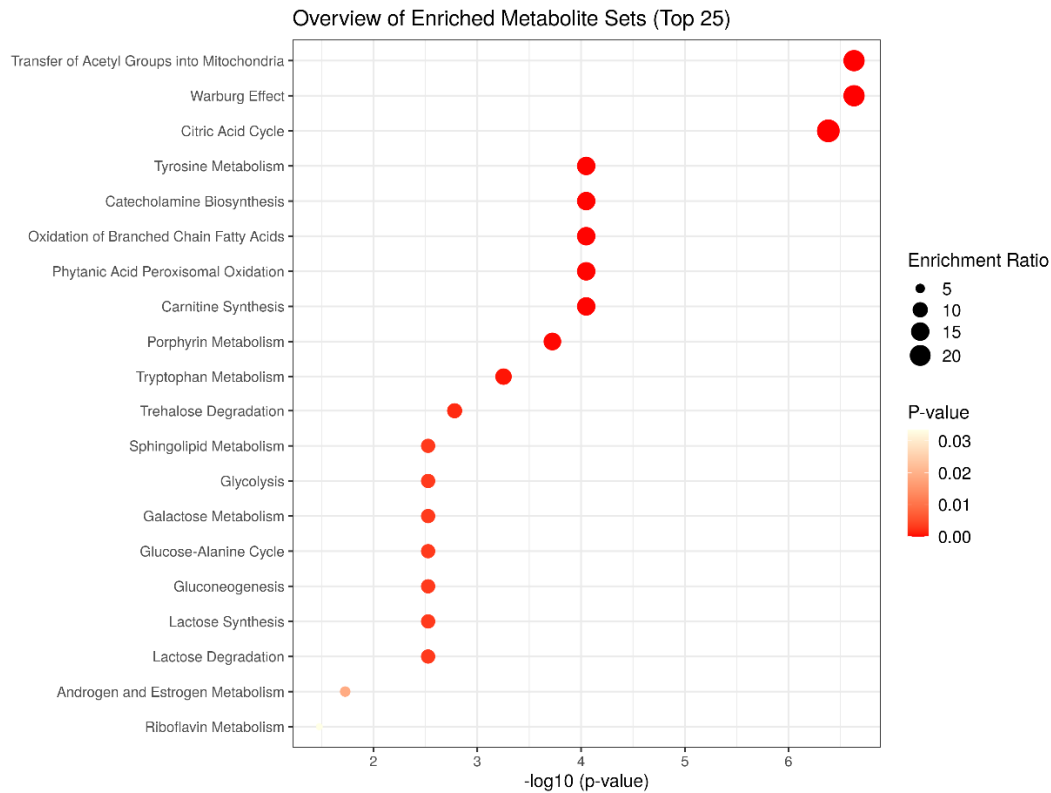

**Fig. S18** Dysregulated metabolic pathways between BC and PC based on quantitative metabolite set enrichment analysis (qMSEA) of differential metabolites..



**Table S6.** Parameters of seven different machine learning models using all  $m/z$  features of test sets.

|          | <b>Model</b> | <b>AUC</b> | <b>Accuracy</b> | <b>F1</b> | <b>Precision</b> | <b>Recall</b> |
|----------|--------------|------------|-----------------|-----------|------------------|---------------|
| HC vs GU | NB           | 0.933      | 0.827           | 0.818     | 0.839            | 0.827         |
|          | RF           | 0.929      | 0.864           | 0.860     | 0.870            | 0.864         |
|          | SVM          | 0.903      | 0.765           | 0.729     | 0.829            | 0.765         |
|          | LR           | 0.853      | 0.790           | 0.788     | 0.787            | 0.790         |
|          | kNN          | 0.843      | 0.765           | 0.768     | 0.777            | 0.765         |
|          | NN           | 0.814      | 0.765           | 0.769     | 0.784            | 0.765         |
|          | AdaBoost     | 0.703      | 0.704           | 0.708     | 0.720            | 0.704         |
| BC vs PC | SVM          | 0.949      | 0.826           | 0.825     | 0.830            | 0.826         |
|          | LR           | 0.936      | 0.841           | 0.841     | 0.841            | 0.841         |
|          | NN           | 0.928      | 0.884           | 0.884     | 0.884            | 0.884         |
|          | RF           | 0.921      | 0.884           | 0.883     | 0.895            | 0.884         |
|          | NB           | 0.919      | 0.841           | 0.839     | 0.847            | 0.841         |
|          | kNN          | 0.909      | 0.855           | 0.855     | 0.861            | 0.855         |
|          | AdaBoost     | 0.823      | 0.826           | 0.825     | 0.830            | 0.826         |
| BC vs HC | SVM          | 0.845      | 0.768           | 0.765     | 0.795            | 0.768         |
|          | NN           | 0.804      | 0.826           | 0.824     | 0.835            | 0.826         |
|          | RF           | 0.803      | 0.696           | 0.692     | 0.713            | 0.696         |
|          | NB           | 0.741      | 0.522           | 0.399     | 0.761            | 0.522         |
|          | AdaBoost     | 0.663      | 0.667           | 0.664     | 0.668            | 0.667         |
|          | LR           | 0.651      | 0.696           | 0.694     | 0.696            | 0.696         |
|          | kNN          | 0.604      | 0.565           | 0.565     | 0.567            | 0.565         |
| PC vs HC | SVM          | 0.943      | 0.807           | 0.805     | 0.829            | 0.807         |
|          | LR           | 0.928      | 0.719           | 0.710     | 0.771            | 0.719         |
|          | NB           | 0.916      | 0.842           | 0.842     | 0.843            | 0.842         |
|          | RF           | 0.909      | 0.807           | 0.804     | 0.843            | 0.807         |
|          | NN           | 0.893      | 0.807           | 0.802     | 0.863            | 0.807         |
|          | kNN          | 0.806      | 0.684           | 0.677     | 0.716            | 0.684         |
|          | AdaBoost     | 0.759      | 0.754           | 0.753     | 0.769            | 0.754         |

RF (Random Forest), SVM (Support Vector Machines), NN (Neural Network), kNN (k-Nearest Neighbor), NB (Naive Bayes), LR (Logistic Regression). The equations of the relevant parameters are given in ESI† (Equations).

**Table S7.** Parameters of seven different machine learning models using differential metabolites features of test sets.

|          | <b>Model</b> | <b>AUC</b> | <b>Accuracy</b> | <b>F1</b> | <b>Precision</b> | <b>Recall</b> |
|----------|--------------|------------|-----------------|-----------|------------------|---------------|
| HC vs GU | NN           | 0.940      | 0.901           | 0.903     | 0.905            | 0.901         |
|          | SVM          | 0.925      | 0.864           | 0.865     | 0.867            | 0.864         |
|          | NB           | 0.892      | 0.802           | 0.805     | 0.809            | 0.802         |
|          | LR           | 0.879      | 0.815           | 0.813     | 0.812            | 0.815         |
|          | RF           | 0.726      | 0.691           | 0.694     | 0.696            | 0.691         |
|          | AdaBoost     | 0.725      | 0.753           | 0.762     | 0.779            | 0.753         |
|          | kNN          | 0.666      | 0.593           | 0.618     | 0.692            | 0.593         |
| BC vs PC | NN           | 0.971      | 0.899           | 0.898     | 0.901            | 0.899         |
|          | LR           | 0.969      | 0.812           | 0.811     | 0.853            | 0.812         |
|          | RF           | 0.936      | 0.826           | 0.824     | 0.828            | 0.826         |
|          | kNN          | 0.934      | 0.768           | 0.763     | 0.849            | 0.768         |
|          | SVM          | 0.913      | 0.812           | 0.812     | 0.822            | 0.812         |
|          | NB           | 0.897      | 0.797           | 0.798     | 0.804            | 0.797         |
|          | AdaBoost     | 0.76       | 0.768           | 0.767     | 0.767            | 0.768         |

RF (Random Forest), SVM (Support Vector Machines), NN (Neural Network), kNN (k-Nearest Neighbor), NB (Naive Bayes), LR (Logistic Regression). The equations of the relevant parameters are given in ESI† (Equations).

## References

1. Q. He, S. Chen, J. Wang, J. Hou, J. Wang, S. Xiong and Z. Nie, *Clin Chim Acta*, 2013, **420**, 94-98.
2. C. Burton and Y. Ma, *Current Medicinal Chemistry*, 2019, **26**, 5-28; Q. Wen, P. Boshier, A. Myridakis, I. Belluomo and G. B. Hanna, *Metabolites*, 2021, **11**.
